1  
2 **Application of a bioinformatic pipeline to RNA-seq data identifies novel virus-**  
3 **like sequence in human blood**

4  
5  
6  
7 Marko Melnick<sup>\*</sup>, Patrick Gonzales<sup>\*</sup>, Thomas J. LaRocca<sup>†</sup>, Robin D. Dowell<sup>‡</sup>,  
8 Yuping Song<sup>\*\*</sup>, Joanne Wu<sup>‡‡</sup>, Michael Benatar<sup>‡‡</sup>, Björn Oskarsson<sup>§§</sup>, Leonard Petrucelli<sup>\*\*</sup>,<sup>††</sup>,  
9 Christopher D. Link<sup>\*,§</sup> Mercedes Prudencio<sup>\*\*</sup>,<sup>††</sup>

10  
11  
12  
13  
14  
15  
16  
17  
18  
19  
20  
21 <sup>\*</sup> Integrative Physiology, University of Colorado, Boulder, Colorado, 80303, USA

22  
23 <sup>†</sup> Department of Health and Exercise Science, Center for Healthy Aging, Colorado State  
24 University, Fort Collins, Colorado, 80523, USA

25  
26 <sup>‡</sup> BioFrontiers Institute and Department of Molecular, Cellular and Developmental Biology,  
27 University of Colorado, Boulder, Colorado, 80303, USA

28  
29 <sup>§</sup> Institute for Behavioral Genetics, University of Colorado, Boulder, Colorado, 80303, USA

30  
31 <sup>\*\*</sup> Department of Neuroscience, Mayo Clinic, 4500 San Pablo Road, Jacksonville, Florida,  
32 32224, USA

33  
34 <sup>††</sup> Neuroscience Graduate Program, Mayo Clinic Graduate School of Biomedical Sciences,  
35 Jacksonville, Florida, 32224, USA

36  
37 <sup>‡‡</sup> Department of Neurology, University of Miami, Miami, Florida, 33136, USA

38  
39 <sup>§§</sup> Department of Neurology, Mayo Clinic, 4500 San Pablo Road, Jacksonville FL, 32224, USA

40  
41 Data available at NCBI Sequence Read Archive under the accession number (**PRJN**).

42 Supplemental material available at figshare: [https:// doi.org/\(INSERT\)](https://doi.org/(INSERT)).

43 Code available at <https://github.com/Senorelegans/MysteryMiner>.

44  
45  
46  
47  
48  
49  
50  
51  
52  
53  
54  
55  
56  
57  
58  
59  
60  
61  
62  
63  
64  
65  
66  
67  
68  
69  
70  
71  
72  
73  
74  
75  
76  
77  
78  
79  
80  
81  
82  
83  
84  
85  
86  
87

**Application of a bioinformatic pipeline to RNA-seq data identifies novel virus-like sequence in human blood**

Keywords: ALS, Transcriptomics, RNA-seq, Microbiome, Virome

Corresponding author  
Phone: 303-735-5112  
Department of Integrative Physiology  
354 UCB  
Boulder Colorado, 80303  
Email: Marko.Melnick@colorado.edu

Mercedes Prudencio  
4500 San Pablo Road,  
Griffin Building Rm 221  
Jacksonville, FL 32224  
Phone: 904-953-6638; Fax: 904-953-7370  
Email: Prudencio.Mercedes@Mayo.edu

## ABSTRACT

Numerous reports have suggested that infectious agents could play a role in neurodegenerative diseases, but specific etiological agents have not been convincingly demonstrated. To search for candidate agents in an unbiased fashion, we have developed a bioinformatic pipeline that identifies microbial sequences in mammalian RNA-seq data, including sequences with no significant nucleotide similarity hits in GenBank. Effectiveness of the pipeline was tested using publicly available RNA-seq data. We then applied this pipeline to a novel RNA-seq dataset generated from a cohort of 120 samples from amyotrophic lateral sclerosis (ALS) patients and controls, and identified sequences corresponding to known bacteria and viruses, as well as novel virus-like sequences. The presence of these novel virus-like sequences, which were identified in subsets of both patients and controls, were confirmed by quantitative RT-PCR. We believe this pipeline will be a useful tool for the identification of potential etiological agents in the many RNA-seq data sets currently being generated.

## INTRODUCTION

### Background of organisms in neurodegeneration

Infection has been proposed to play a role in multiple neurodegenerative diseases<sup>1</sup>, including amyotrophic lateral sclerosis (ALS)<sup>2</sup>. ALS is the most common motor neuron disease in adults, with the majority of individuals dying within 3-5 years of symptom onset. The disease is defined by the degeneration and death of motor neurons in the brain and spinal cord, resulting in progressive weakness and eventually death, typically from respiratory muscle weakness<sup>3</sup>. Around 5-10% of ALS cases are inherited, termed familial ALS (fALS), with the remaining cases considered sporadic ALS (sALS). After decades of study, the etiology of sALS remains a mystery, although suspected risk factors for ALS include exposure to heavy metals, pesticides, chemical solvents, cigarette smoke, and unidentified factors related to US military service<sup>4-7</sup>.

Along with these environmental risk factors, there has been a long history, with variable success, in the search for pathogens that might contribute to ALS<sup>8-12</sup> and other neurodegenerative diseases such as Alzheimer's disease (AD)<sup>13-15</sup>, Parkinson's disease (PD)<sup>16-18</sup>, and multiple sclerosis (MS)<sup>19</sup>.

Diverse pathogens have been reported in the blood, cerebrospinal fluid (CSF) and central nervous system (CNS) from ALS patients. For example, bacteria that have been detected include *Cutibacterium acnes*, *Corynebacterium sp.*, *Fusobacterium nucleatum*, *Lawsonella clevelandensis*, and *Streptococcus thermophilus* in CSF<sup>20</sup>, and mycoplasma in blood<sup>21</sup>. Fungi, including *Candida famata*, *Candida albicans*, *Candida parapsilosis*, *Candida glabrata*, and *Penicillium notatum*, have been detected in CSF, while *Malassezia globosa*, *Cryptococcus neoformans*<sup>11</sup>, and *Candida albicans* have been found in various regions of the CNS<sup>11,22,23</sup>. The search for viruses that contribute to ALS pathology is much more extensive and includes studies on herpes virus<sup>9,24</sup>, enterovirus<sup>9,25-28</sup>, human immunodeficiency virus (HIV)<sup>29,30</sup>, and human endogenous retrovirus (HERV-K)<sup>31-33</sup>. Importantly, multiple studies using immunohistochemistry have shown an

134 increased load of various pathogens in ALS samples compared to controls in multiple tissues  
135 suggesting these pathogens are present and cannot be simply attributed to contamination<sup>9,11,20,22,23</sup>.  
136 Ultimately, the presence of ALS dysbiosis is unresolved and remains an active area of investigation  
137 with evidence for<sup>34-38</sup> and against<sup>39</sup> it.

138 The biological role that these alternative microbiotas play in ALS is also unclear. ALS  
139 patients may have a compromised blood brain barrier (BBB) or blood spinal cord barrier (BSCB)  
140 function<sup>40,41</sup>. It has been reported that ALS patients also have elevated Gram negative  
141 endotoxin/lipopolysaccharide (LPS) in the blood<sup>42</sup>. Patients with ALS also display activation of  
142 the innate immune system along with changes in blood<sup>43,44</sup>, spinal cord and motor neurons<sup>45</sup>, but  
143 if and how bacteria might influence activation is an active area of research. A “dual hit” hypothesis  
144 by Correia et al. suggests inflammation via LPS may contribute to mis-localization and  
145 aggregation of ALS-implicated protein TAR DNA-binding protein 43 (TDP-43)<sup>46</sup>.

146 Numerous studies have looked for biomarkers of ALS<sup>47</sup> using metabolomics<sup>48,49</sup>,  
147 neuroinflammation<sup>50,51</sup>, DNA methylation<sup>52,53</sup>, gene expression<sup>54</sup>, microRNA expression<sup>55,56</sup> and  
148 our previous study which analyzed protein levels of poly(GP) in *C9ORF72*-associated ALS  
149 (c9ALS)<sup>57</sup>. The search for pathogens using sequencing data from blood samples in ALS patients  
150 has been conducted before<sup>58-61</sup>, but previous efforts have not looked for novel pathogens.

151 Next-generation sequencing (NGS) technologies have shown broad detection of pathogens  
152 in a target-independent unbiased fashion<sup>62-65</sup>. However, designing a microbial detection  
153 experiment is non-trivial considering the variety of methods<sup>66</sup> and algorithms<sup>67</sup> that can be applied.  
154 Our primary goal when designing a new pipeline was to be conservative and unbiased with regards  
155 to discovery of novel pathogens. Furthermore, we wanted our pipeline to allow for the  
156 quantification of both novel and known pathogens. While other pipelines have used reads that do  
157 not map to the host genome (unmapped reads) for microbial identification and quantification, these  
158 pipelines cannot be used for discovery as they rely on existing databases of microbial genomes<sup>68-</sup>  
159 <sup>71</sup>. Thus, we opted for de-novo assembly of unmapped reads into contigs, followed by alignment  
160 of unmapped reads back to these contigs for quantification. A similar pipeline known as IMSA<sup>72</sup>  
161 uses this strategy, but disregards contigs that might be identified by translated amino acid sequence  
162 similarity using BLASTX (a set we call the “dark biome”) as well as subsequent contigs with no  
163 BLASTN or BLASTX hit (a set we call the “double dark biome”).

164 We validated our pipeline by using datasets with known bacterial or viral infections. We  
165 also examined the differences in microbial identification between polyA and total RNA recovery  
166 in multiple tissues, and investigated the effects of globin depletion of blood samples. We then used  
167 our pipeline on a novel blood dataset (termed “Our Study”) as well as on five other published ALS  
168 datasets from blood or spinal cord samples, analyzed each dataset individually, and analyzed  
169 across datasets for changes in microbiota. While we did not identify any microbes enriched in the  
170 blood of ALS patients, we did identify and validate a novel virus-like sequence, demonstrating the  
171 potential of the bioinformatic pipeline we have established.

172

173

174

175

176

## MATERIALS AND METHODS

### Blood Collection and RNA Extraction

177 A total of 120 RNA whole blood samples constitute Our Study, which included 30 healthy  
178 controls (from general population that do not have blood relatives suffering from ALS, CTL), 30  
179

180 pre-symptomatic *C9ORF72* mutant carriers (C9A), 30 symptomatic *C9ORF72* ALS cases (C9S),  
181 and 30 symptomatic *C9ORF72*-negative ALS cases (SYM). PAXgene blood RNA tubes were  
182 collected at Mayo Clinic Jacksonville and at University of Miami. All 120 RNA samples selected  
183 for RNA-seq were received and processed at Mayo Clinic Jacksonville using PAXgene blood RNA  
184 kit following manufacturer's recommendations (Qiagen). Blood RNA was of high quality,  
185 assessed in an Agilent Bioanalyzer (Agilent), with RNA integrity values ranging from 7.4 to 9.8,  
186 with a median value of 8.7. RNA samples were then sent to The Jackson Laboratory for globin  
187 depletion, library preparation and sequencing of total blood RNA.

188

### 189 **Globin Depletion**

190 Due to the abundance of large haemoglobin RNA transcripts present in the blood, a globin  
191 depletion step, using the Ambion GLOBINclear kit (AM1980), was performed before sequencing  
192 of the blood RNA samples in order maximize coverage on non-globin genes. In brief, one  
193 microgram of total RNA was used as starting material, and specific biotinylated oligos were used  
194 to capture globin mRNA transcripts. The capture oligos were hybridized with total RNA samples  
195 at 50°C for 30 min. Streptavidin magnetic beads were then used to bind to the biotinylated capture  
196 oligos hybridized to globin mRNA by incubating at 50°C for 30 min. The magnetic streptavidin  
197 beads-biotin complex were then captured to the side of the tubes by a magnet, and the resulting  
198 supernatant is free of globin mRNA. The globin depleted RNA was further purified by RNA  
199 binding beads and finally eluted in elution buffer. The resulting RNA free of >95% globin mRNA  
200 transcripts was then processed for next generation sequencing. Of note, to assess the efficiency of  
201 the globin RNA depletion, 10% of the samples processed were selected randomly and amplified  
202 using a Target-Amp Nano labeling kit (Epicentre). Samples were normalized to 100 ng input and  
203 reverse transcribed. First strand cDNA was generated by incubating at 50°C for 30 min with first  
204 strand premix and Superscript III. This was followed by second strand cDNA synthesis through  
205 DNA polymerase by incubating at 65°C for 10 min and at 80°C for 3 min. In-vitro transcription  
206 was then performed at 42°C for 4 hours followed by purification using RNeasy mini kit (Qiagen).

207 Due to the large number of samples, the globin depletion step was performed in two batches.  
208 We provided guidelines on how samples would be divided among the batches and also for how  
209 samples would be grouped in the sequencing runs in order to minimize technical variability. The  
210 Jackson Laboratory personnel were blinded to the identity of the samples.

211 RNA-seq of total blood RNA (globin and ribosomal RNA depleted) was performed in an  
212 Illumina HiSeq4000 with >70 million read pairs per sample. Raw reads were then sent back to us  
213 for bioinformatics analyses.

214

### 215 **Quantitative RT-PCR for blood RNA samples**

216 A total of 500 ng of total blood RNA was used for reverse transcription polymerase chain  
217 reaction (RT-PCR), using the High Capacity cDNA Transcription Kit with random primers  
218 (Applied Biosystems). Quantitative real-time PCR (qRT-PCR) was performed using SYBR  
219 GreenER qPCR SuperMix (Invitrogen). Samples were run in triplicate, and qRT-PCRs were run  
220 on a QuantStudio 7 Flex Real-Time system (Applied Biosystems).

221

222 List of primers and their sequences:

223 *RDRP* forward 5'-GCTGTCAAATCGGTTTCCAAC-3';

224 *RDRP* reverse 5'-CTGCCTTCGTCATCTTGGAG-3';

225 *GAPDH* forward 5'-GTTTCGACAGTCAGCCGCATC-3';

226 *GAPDH* reverse 5'-GGAATTTGCCATGGGTGGA-3'.

227

## 228 **Transcriptomics**

229 See pipeline description in results for an overview of the pipeline; see bioinformatics  
230 supplement File S1 for a more detailed description of the analysis pipeline, versions, and statistical  
231 quantification. All data in this study was processed identically using the pipeline.

232

233

## 234 **Statistical Analysis**

235 To assess statistical differences between conditions, a two tailed Student's *t*-test is  
236 calculated using normalized coverage for contigs or binned normalized coverage for  
237 species/genus, etc. The number of contigs or genus/species is used to obtain an adjusted p-value  
238 using scipy in Python. Cutoff for statistical significance is less than an adjusted p-value of 0.05  
239 unless otherwise stated.

240

241

## 242 **Data availability**

243 Raw sequencing data for Our Study dataset is available in the NCBI Sequence Read  
244 Archive under the accession number (PRJN). All other datasets are publicly available and all of  
245 the code used in this manuscript is available at <https://github.com/Senorelegans/MysteryMiner>.  
246 Supplemental material available at figshare: [https:// doi.org/INSERT](https://doi.org/INSERT).

247

248

249

250

251

# RESULTS

## 252 **Pipeline description**

253 Mystery Miner is written as a Nextflow pipeline. Below is a short overview of the Mystery  
254 Miner pipeline (Fig1). A more in-depth explanation, list of software and versions used, and typical  
255 parameters of each step is described in the bioinformatics supplement, and all of the code used in  
256 this manuscript can be found at <https://github.com/Senorelegans/MysteryMiner>.

257 Raw reads were first checked for quality using FastQC then trimmed to remove both  
258 adaptor contamination and low quality basecalls using Trimmomatic. Trimmed reads were then  
259 mapped to the host genome using multiple alignment algorithms in series (STAR, Bowtie2) and  
260 unmapped reads were retained for contig assembly. Filtering out host reads made downstream  
261 assembly faster and required less memory. We assembled contigs from unmapped reads with the  
262 SPAdes assembler (with “-rna” setting). This assembler was chosen for its recent use in studies of  
263 microbial diversity<sup>73</sup> and proven robustness to biological and technical variation<sup>74</sup>. The species  
264 each contig belongs to was identified with BLASTN using default settings, and the top hit for each  
265 contig was retained (a set we call “regular biome”). Contigs with no BLASTN hits were then  
266 filtered to remove highly repetitive regions (DUST) and retained if they had a greater than 60%  
267 pairwise alignment (LAST) between contigs assembled from a single sample, group/condition, or  
268 all samples.

269 We then identified contigs that lacked detectable nucleotide similarity to any GenBank  
270 entry but showed similarity at the amino acid level using BLASTX (“dark biome”). Furthermore,  
271 contigs with no BLASTN or BLASTX hits were labelled as “double dark biome” (also filtered by

272 DUST and LAST). Every contig in the “regular biome” and “dark biome” were then queried  
273 against the Joint Genome Institute Server for additional taxonomic information. As Mystery Miner  
274 is an agnostic tool, it cannot distinguish between true tissue or cell-associated microbes and  
275 experimentally introduced contamination.

276 For quantification, we mapped the non-host reads using Bowtie2 to the contigs obtained  
277 from SPAdes. Next, we mapped reads to contigs using samtools mpileup (default mapq score) to  
278 calculate the amount of reads over each base pair in a contig. We then calculated coverage on the  
279 contigs by summing all of the counts for each base pair in a contig and dividing by the length of  
280 the contig. We then calculated normalized coverage by library size using the number of mapped  
281 reads to the host genome. This gave us normalized coverage (NC) for a contig or binned  
282 normalized coverage (BNC) for multiple contigs within a species/genus, etc. To assess statistical  
283 differences between conditions, a Student’s *t*-test was calculated through NC or BNC, using the  
284 number of contigs or genus/species to obtain an adjusted p-value using scipy in Python.

285  
286  
287

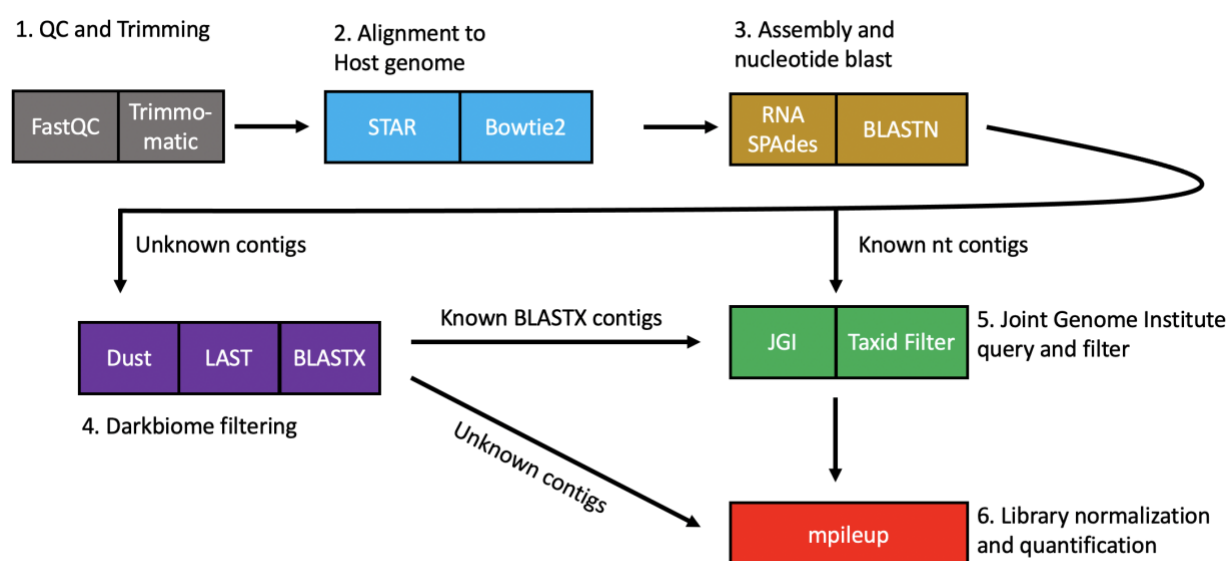

288  
289

### 290 **Figure 1. Diagram of Mystery Miner Pipeline**

291 Reads were first checked with FastQC and trimmed using Trimmomatic (1. grey). Reads were then  
292 aligned to the host genome using various aligners (2. blue). Non-host (unmapped) reads were  
293 assembled into contigs with RNA SPAdes and regular biome contigs were identified with  
294 BLASTN (3. yellow). Unidentified contigs were filtered for repetitive sequences with Dust, filter  
295 by single, group or all with LAST, and dark biome contigs were identified with BLASTX. Double  
296 dark biome unidentified BLASTX contigs were sent directly to quantification (4. purple). Dark  
297 biome and regular biome contigs were assigned complete taxonomy using the JGI server and  
298 filtered one last time to remove mammalian/host genome contigs (5. Green). Non-host reads were  
299 then mapped to all contigs and normalized coverage was calculated for subsequent statistical  
300 analysis.

301  
302

### 303 **Validating Mystery Miner on datasets with known bacterial or viral infection**

304  
305 To confirm that Mystery Miner is able to recover and quantify known bacterial infections  
306 from sequencing data, we utilized an *in vitro* model of *Chlamydia trachomatis* infection  
307 (Humphrys 2016)<sup>75</sup>. In this study, epithelial cell monolayers were infected with *Chlamydia*  
308 *trachomatis*; and polyA RNA (6 samples) and total RNA (6 samples) were sequenced 1 hour and  
309 24 hours post infection (hpi). Using the Mystery Miner pipeline, out of  $5.32 \times 10^6$  reads from all  
310 of the samples,  $6.04 \times 10^5$  reads remained unmapped (~11.34%) after trimming and mapping to  
311 the host genome (File S2). From these non-host reads, 3,257 contigs were assembled and 1,199 of  
312 these contigs were identified as regular biome (File S3). An additional 27 contigs had no BLASTN  
313 hit. Of these, we identified 2 dark biome (BLASTX identified) and no double dark biome (no  
314 BLASTX or BLASTN hit) contigs (File S4 and File S5).

315 Using Mystery Miner we successfully identified, and found significantly elevated levels,  
316 of *Chlamydia trachomatis* (BNC by species) in 24 hours post infection (hpi) samples compared to  
317 1 hpi samples in both polyA (P<sub>adj</sub> = 0.004) and total RNA (P<sub>adj</sub> = 0.0005). In addition to  
318 *Chlamydia trachomatis*, we identified 6 additional bacterial species and one viral species  
319 (Alphapapillomavirus 7) in the samples (Figure 2A), including significantly elevated levels of  
320 *Mycoplasma hyorhinis* contigs in total RNA samples. No significant differences were observed in  
321 the dark or double dark contigs (File S6).

322 To confirm that the pipeline can detect known viral infections, we ran Mystery Miner on a  
323 total RNA dataset from an *in vitro* model of severe acute respiratory syndrome coronavirus  
324 (SARS-CoV) 1 or 2 infection (Emanuel2020<sup>76</sup>). In this study human epithelial Calu3 cells were  
325 infected with SARS-CoV-1 or SARS-CoV-2 (4, 12, or 24 hours), mock (4 or 24 hours), or  
326 untreated (4 hours).

327 Out of the  $2.81 \times 10^8$  reads obtained from all of the samples,  $8.23 \times 10^7$  reads remained  
328 unmapped (~29%) after trimming and mapping to the host genome (File S2). From these non-host  
329 reads, 42,816 contigs were assembled, of which 1,346 regular biome, 27 dark biome, and 7 double  
330 dark biome contigs passed the filtering steps (File S2, File S3, File S4, File S5)

331 Mystery Miner successfully identified both SARS-CoV-2 and SARS-CoV-1 isolates and  
332 found significantly elevated levels of each virus compared to controls (Figure 2B). Hereafter we  
333 refer to SARS-CoV-1 or SARS-CoV-2 infected cells as COV1 or COV2 to avoid confusion with  
334 recovered names of contigs. Consistent with the viruses being similar, we identified both SARS-  
335 CoV-2 and SARS-CoV-1 in both the COV1-24hr and COV2-24hr samples when compared to  
336 mock-24hr. However, when we compared COV2-24hr to COV1-24hr, we were able to distinguish  
337 SARS-CoV-1 isolates from SARS-CoV-2 in the appropriate samples (i.e., SARS-CoV-2 was  
338 significantly elevated in COV2). Similar results were seen in the 12 hour samples but the 4 hour  
339 samples did not have sufficient viral reads to detect either SARS-CoV virus (File S7). To simulate  
340 a novel virus, we ran Mystery Miner on versions of the BLASTN and BLASTX databases obtained  
341 before SARS-CoV-2 was discovered and were able to properly identify SARS-CoV-2 as a bat  
342 related coronavirus<sup>77</sup> (Figure S1) (File S7).

343 Collectively, these data show that Mystery Miner is able to identify potential bacterial and  
344 viral infections, properly identify infected samples using quantification, and detect significant  
345 differences between infected samples and controls for bacteria, viruses, and isolates of a virus.

346  
347  
348



349

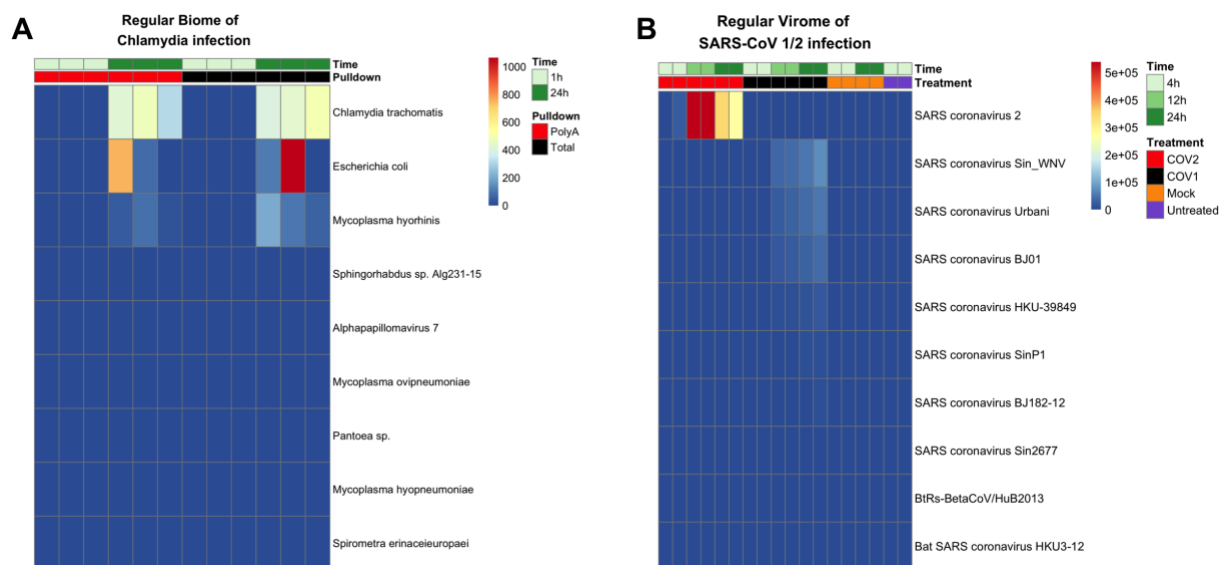

350

351

352

353 **Figure 2. Heatmap of binned normalized coverage for bacterial or viral infected datasets. A.**  
 354 Regular biome contigs binned by species from Humphrys et al., 2016. Time refers to 1or 24 hours  
 355 post infection (hpi) of epithelial cell monolayers with *Chlamydia trachomatis* (green). Pulldown  
 356 refers to library enrichment for polyA RNA (red) or total RNA (black). **B.** Regular virome of  
 357 contigs binned by name from Emanuel et al., 2020 for SARS-CoV-2 infected cells (COV2) (red),  
 358 or SARS-CoV-1infected cells (COV1) (black), mock virus (orange), or untreated sample (purple).  
 359 Time refers 4,12, or 24 hpi of Calu3 cells with indicated virus (green). Top 10 hits per experiment  
 360 shown for brevity.

361

362

363

364

365

366

### 367 Effects of library pulldown or globin depletion in RNA-seq datasets

368

369 In order to compare effects of library enrichment or depletion, we compared recovered  
 370 pathogens in a dataset that has polyA enrichment or rRNA depleted total RNA from blood or  
 371 colonic tissue (VonSchack2018)<sup>78</sup>. When we compared polyA RNA vs total RNA and looked at  
 372 BNC by superkingdom of bacteria we found significantly more reads map to bacteria for total  
 373 RNA than polyA RNA (P<sub>adj</sub> = 0.0349), in blood but not in colon (P<sub>adj</sub>=0.11709) (Figures S2 and  
 374 File S8). We found similar amounts of significant BNC by species for polyA RNA vs total RNA  
 375 in blood (29) and in colon (26). We then looked at significant BNC by genus and found double the  
 376 amount in blood (14) compared to colon (7), with only one significant genus (*Actinomyces*) found  
 377 in both comparisons. We did not find any significant differences in coverage when we looked at  
 378 the species, genus or superkingdom level for viruses (File S8). We conclude that library

379 enrichment with total RNA compared to polyA RNA increases bacterial recovery and diversity in  
380 blood.

381 We next looked at a RNA-seq dataset from whole blood with globin depleted (GD) vs non-  
382 globin depleted (NGD) total RNA (Shin2014<sup>79</sup>). With BNC by superkingdom, we found  
383 significantly increased levels in globin depleted vs. not-depleted samples for both bacteria (P<sub>adj</sub> =  
384 0.004) (Figure S3) and viruses (P<sub>adj</sub> = 0.030) (Figure S4). We also found significant differences  
385 in BNC by species (Figure S5) or genus (Figure S6) primarily from *E. coli* with elevated levels in  
386 globin-depleted blood RNA. We did not find any significant differences when we looked for  
387 viruses at the species or genus level (File S9).  
388

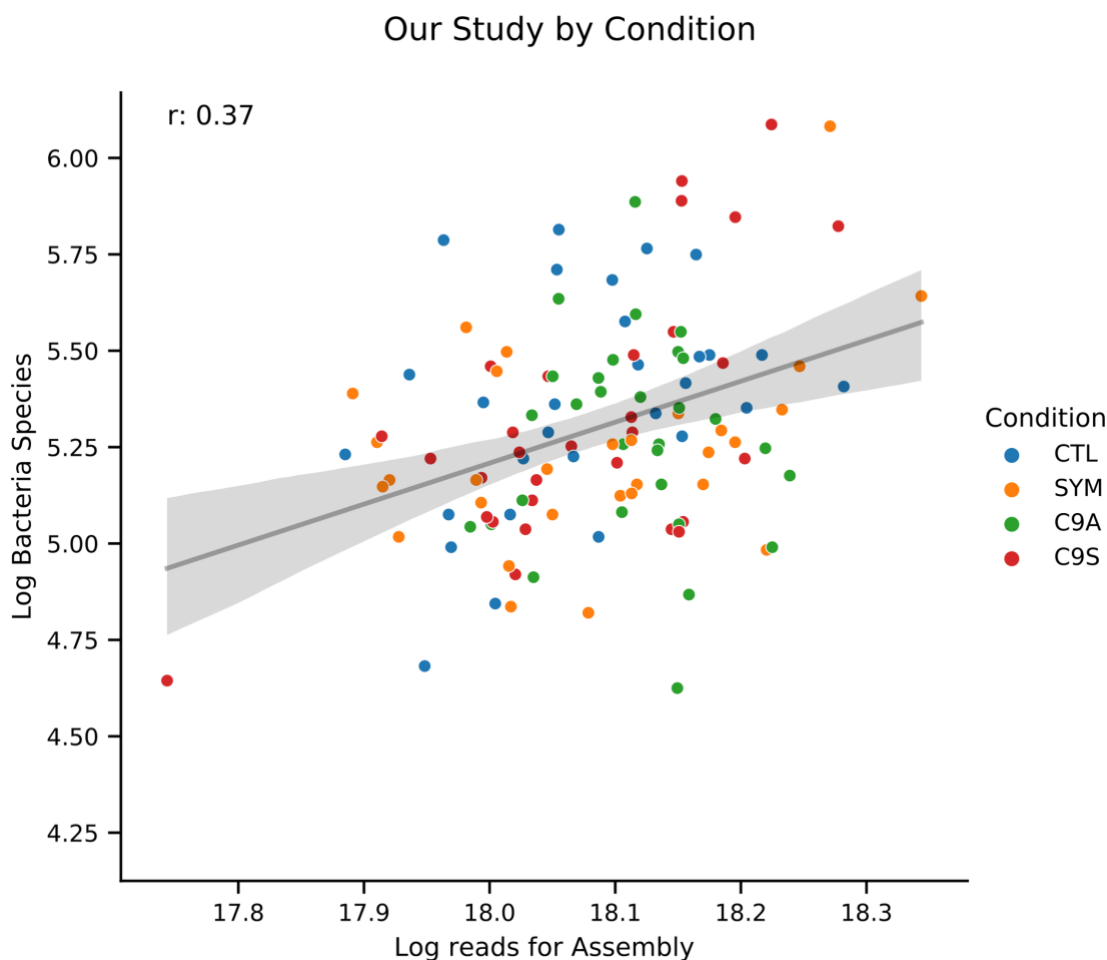

389 **Figure 3. Log number of bacterial species vs Log reads for Assembly in Our Study.** Scatterplot  
390 where each dot is a sample from a dataset with log number of bacterial contigs assembled on the  
391 Y-axis and Log reads used in SPAdes on the X-axis. Samples show a modest correlation (Pearson's  
392  $r=0.37$ ) between library size and bacterial species recovered. Data fit with a regression (black line)  
393 and 95% confidence interval (gray area).  
394

395  
396  
397  
398  
399

## 400 **Analysis of Our Study**

401 We used Mystery Miner on our novel RNA-seq dataset of globin depleted and rRNA  
402 depleted total blood RNA from 120 individuals. These samples were from four subject groups  
403 including healthy control participants (CTL), ALS symptomatic *C9ORF72* negative patients  
404 (SYM), *C9ORF72* positive ALS symptomatic patients (C9S) and *C9ORF72* positive  
405 asymptomatic individuals (C9A).

406 The entire dataset contains a combined  $8.64 \times 10^9$  reads. Approximately 2.7% ( $2.34 \times$   
407  $10^8$ ) of the reads did not map to the human genome. From these non-host reads 2,976,988 contigs  
408 were assembled and 17,047 BLASTN contigs (regular biome) were identified. A total of 25,815  
409 contigs had no BLASTN hit and after filtering we identified 2,980 dark biome (BLASTX  
410 identified) and 859 double dark biome (no BLASTX or BLASTN hit) contigs (File S2, File S3,  
411 File S4, File S5).

412 In general, we found a modest positive correlation between library size and number of  
413 bacterial contigs assembled, species detected (Figure 3), and genera detected for each sample as  
414 well as a homogenous mixture of samples with respect to disease status. No specific taxonomy or  
415 contig sequence correlated with participant class within the dataset. Yet, by pooling bacterial read  
416 counts across all of the samples, we found *alpha proteo-bacteria*, *Actinobacteria*, *Firmicutes*, and  
417 *Bacteroidetes* as the most highly represented taxonomies, consistent with other blood biome  
418 studies<sup>80</sup> (Figure S6). Most of the bacterial genera (~65%) assigned to the dark biome contigs were  
419 also found in the regular biome, however this was not the case in the viral sets, as only 5% (4/78)  
420 of dark viral contigs were observed in the regular biome (File S10). This observation suggested  
421 that our pipeline might be identifying novel viral sequences.

422 Within the dark biome contigs, we noted numerous contigs with a region of protein  
423 sequence similarity to RNA-dependent RNA polymerase (RdRP) from multiple RNA viruses,  
424 showing highest similarity to the velvet tobacco mottle virus (first row in heatmap of Figure 4,  
425 complete metadata shown in Figure S7). Our attention was drawn to the largest (~5 kb) dark biome  
426 contig (one of the contigs showing similarity to the velvet tobacco mottle virus) hereafter labeled  
427 as “RDRP contig”. To confirm the presence of the RDRP contig in the original samples, we  
428 designed primers to the RDRP contig and performed reverse transcriptase polymerase chain  
429 reaction (RT-PCR) on seven samples, four of which had high coverage (predicted present) and  
430 three with zero coverage (predicted absent). We found typical levels for detection of a virus<sup>81</sup> in  
431 the samples with high coverage and detected nothing in samples with zero coverage (Table 1). We  
432 conclude that Mystery Miner is biologically validated and can recover unknown pathogens from  
433 human subjects.

434  
435  
436  
437  
438  
439  
440  
441  
442  
443  
444  
445

446  
447  
448

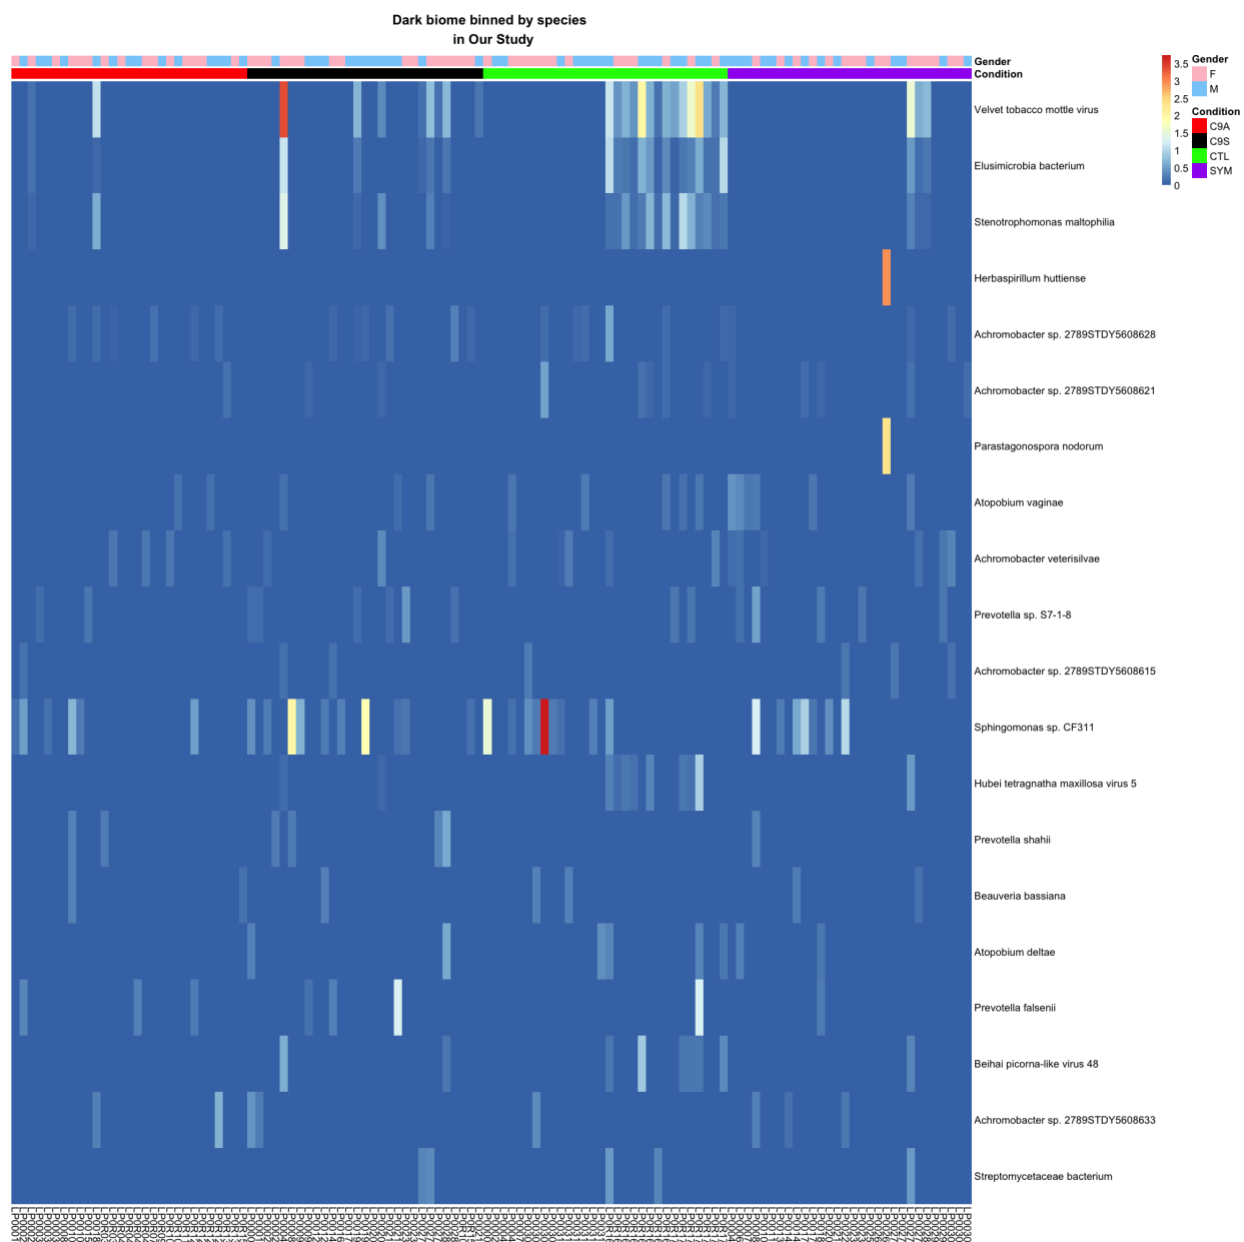

449  
450  
451  
452  
453  
454  
455  
456  
457  
458  
459

**Figure 4. Heatmap of dark biome contigs binned by species in Our Study.**

Heatmap of normalized coverage of dark biome contigs binned by species. The highest coverage belongs to contigs that show high similarity to velvet tobacco mottle virus. Zero coverage is blue and goes to red with increasing values. These samples were from four subject groups including healthy controls [(CTL) green], *C9ORF72* negative ALS symptomatic [(SYM) purple], *C9ORF72* positive ALS symptomatic [(C9S) blue] and *C9ORF72* positive asymptomatic [(C9A) red] patients. Sex indicated as light blue (male) and pink (female). Top 20 species sorted by binned normalized coverage was shown for brevity.

460  
461  
462  
463  
464  
465  
466  
467

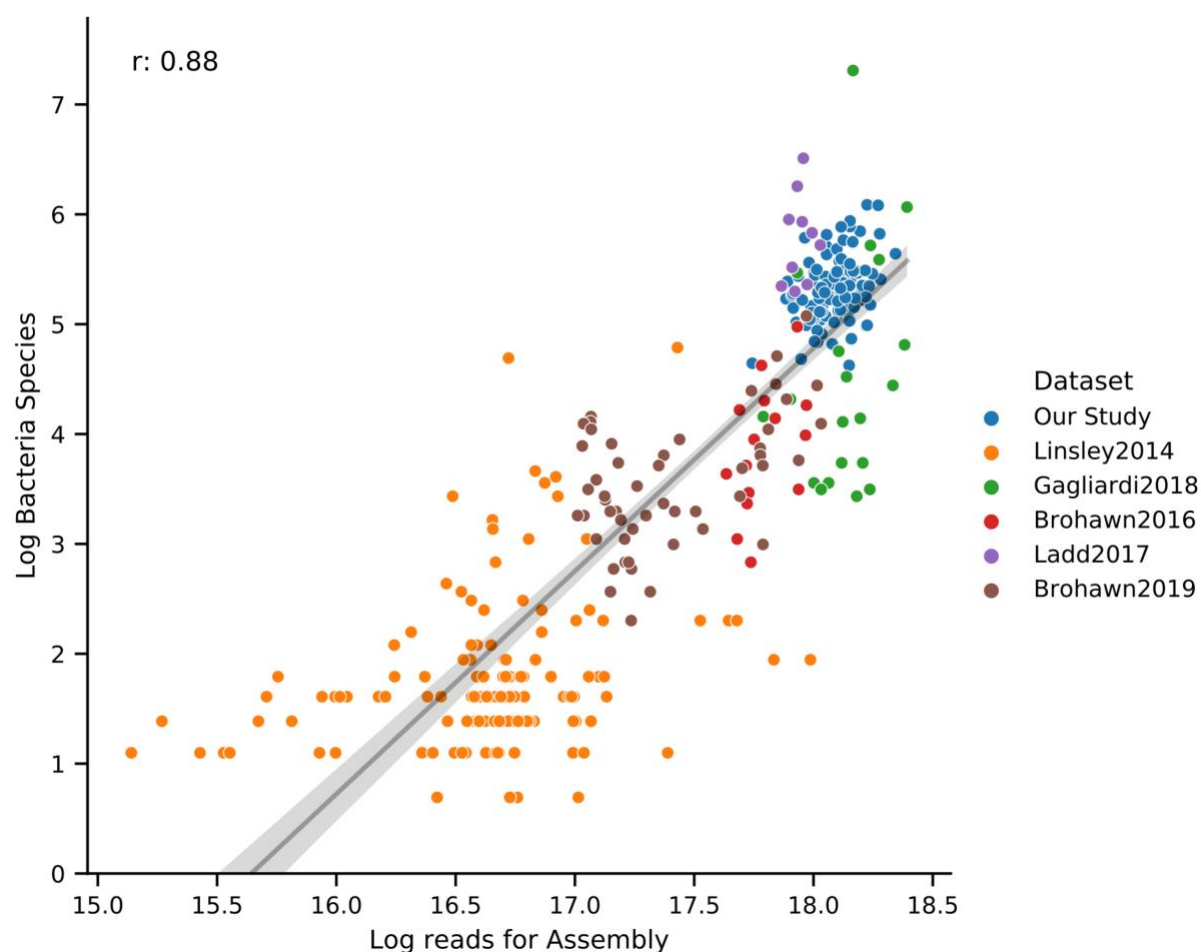

468  
469  
470  
471  
472  
473  
474  
475  
476  
477  
478  
479  
480

**Figure 5. Log number of bacterial species vs Log reads for Assembly for ALS Datasets.**

Scatterplot where each dot is a sample from a dataset with log number of bacterial contigs assembled on the Y-axis and Log reads used in SPAdes on the X-axis. ALS datasets show a high correlation (Pearson's  $r=0.88$ ) between library size and bacterial species recovered. Data fit with a regression (black line) and 95% confidence interval (gray area).

#### **Analysis of published ALS datasets**

We next sought to explore whether similar results would be obtained from other ALS datasets. To this end, we examined five other publicly available ALS datasets, consisting of two that used total RNA from blood (Linsley2014<sup>82</sup>, Gagliardi 2018<sup>58</sup>), and three datasets from spinal cord (Brohawn2016<sup>83</sup>, Ladd2017<sup>84</sup>, Brohawn 2019<sup>85</sup>). We have provided a summary table of

481 datasets for all studies used in this paper (Table 2). As we observed in Our Study, we first noted  
482 that increased library size correlated with an increased number of bacterial contigs assembled,  
483 species detected, and genera detected (Figure 5, and Figure S8-10 show all datasets used in this  
484 study).

485 We then looked at the total overlap of genus or species to determine if there are similarities  
486 in recovered microbial or viral sequences between datasets. For genus in the regular bacteriome,  
487 our dataset had the highest number of unique genus (185), followed by Ladd2017 (117), and  
488 Gagliardi2018 (38). The highest number of overlapping bacterial genus was between our dataset  
489 and Ladd2017 (133) followed by the intersection between our dataset, Ladd2017 and  
490 Gagliardi2018 (61) and there was a modest overlap (24) for 9/10 datasets (Figure 6). We observed  
491 roughly the same trend in the regular bacterial biome at the species level and in the dark bacterial  
492 biome (S Figure 11, File S11). In contrast, the regular virome of each dataset was relatively unique  
493 with very low amounts of overlap ( $\leq 3$ ) between datasets (species and genus shows a similar  
494 pattern). Interestingly, the highest overlap for species in the dark virome was between our dataset  
495 and Ladd2017 (13), one of which is similar to RDRP viruses, although the contigs in Ladd's data  
496 were not similar to the velvet tobacco mottle virus in our dataset (Figure S12, File S12).

497 In addition to comparing datasets using taxonomy, we also compared contigs between  
498 datasets for nucleotide similarity ( $> 70\%$ ) using LAST (File S1 for methods). We found that in  
499 general, datasets in the regular biome with the largest amount of contigs have the most overlap.  
500 Unsurprisingly, in the dark biome we observed less overlap by nucleotide similarity and that our  
501 RDRP contig does not share nucleotide similarity with contigs from any dataset. In addition, we  
502 also compared the nucleotide similarity of double dark biome contigs and found there is not a large  
503 percentage of similar contigs between datasets (File S13).

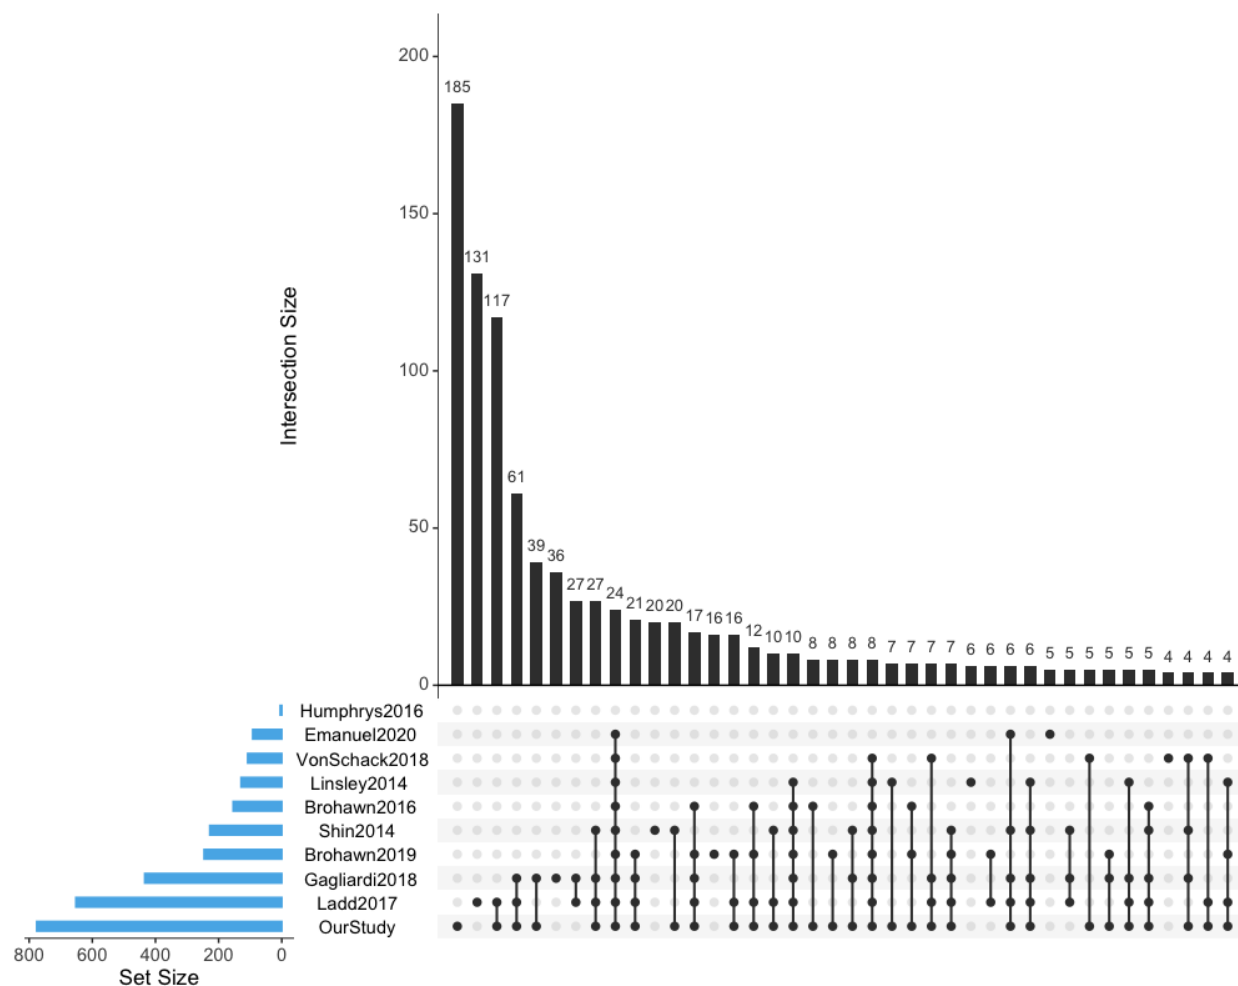

504  
505

**Figure 6. Upset plots of overlapping genus in the regular bacteriome between datasets.**

507 Upset plots are Venn diagram-like plots. A set refers to a dataset used in this study and each set is  
508 on a row with total amounts in a set as a blue bar plot on the left (ordered by set size). The black  
509 histogram on top shows the counts that are in the intersection of sets (a single dot for one dataset  
510 or connected dots for overlap of multiple datasets). Intersections less than 4 are removed for  
511 visualization purposes.

512  
513  
514

**Comparison of taxonomy by condition within ALS datasets**

516 Finally, we looked for differences in ALS vs control samples for each dataset. In the  
517 Gagliardi2014 dataset, when we compared ALS patients with the *FUS* mutation to controls, we  
518 found 3 significant differences in BNC by species in the regular bacteriome (*Neisseria sp.*,  
519 *Pseudomonas sp.*, *Sphingomonas sp.*) and one significant difference in BNC by genus in the dark  
520 bacteriome (*photobacterium*). In ALS patients with mutations in *SOD1* compared to controls, we  
521 found two species significantly different in the regular bacteriome (*Hydrogenophaga crassostreae*,  
522 *Sphingomonas hengshuiensis*) (*Gagliardi FUS* and *SOD1 supplement*). We did not find anything  
523 significant in sporadic ALS, or in ALS patients with *TARDBP* mutations with regards to

524 genus/species (regular or dark biome or viruses) for Gagliardi2014. We found no significant  
 525 statistical differences between ALS and control samples for genus/species of viruses/bacteria in  
 526 the regular/dark biome for any of the remaining ALS datasets.  
 527

## 528 Meta analysis between datasets

529  
 530 Since our dataset and many others had no significant comparisons for ALS vs control  
 531 groups within each dataset, a meta-analysis between datasets using this criteria would be difficult.  
 532 As a second pass analysis we created a less stringent filtering method in order to compare the  
 533 presence of microbes for each group between datasets (ALS vs. ALS; or controls vs. controls)  
 534 (Figure 7). We assigned a contig to a condition if  $\geq 2$  samples from that condition contain at least  
 535 90% of the summed normalized coverage (from all samples) to the contig. This filtering greatly  
 536 reduced the number of comparable genus/species for each dataset and, for example, reduced the  
 537 genus of the regular bacteriome in our dataset from 305 for all samples to 33 (SYM:8, C9S:6,  
 538 C9A:2, CTL:17) (File S14).

539 When we looked at ALS or control contigs in the regular bacteriome, the highest number  
 540 of unique genus or species was from Ladd2017, and in general there was a small amount of overlap  
 541 between datasets ( $\leq 1$  for ALS or  $\leq 8$  for controls) (Figure 7). When we looked at genus in the dark  
 542 bacteriome we saw no overlap for ALS contigs and low overlap ( $\leq 1$ ) between control conditions  
 543 (species was similar) (File S14). In the regular virome there was no overlap between datasets and  
 544 only our study (one contig from ALS) and Ladd2017 (three from ALS, five from controls) had  
 545 contigs that passed the filter (similar values for species). When we looked in the dark virome by  
 546 genus there was no overlap between datasets, and our dataset had only one genus (*Sobemovirus*  
 547 from controls) with the rest coming from Ladd2017 (18 from controls, 5 from ALS) (File S15). In  
 548 conclusion, despite our conservative and loose approaches, we did not find any convincing  
 549 evidence in ALS samples that the presence (or lack of presence) of an organism (or multiple  
 550 organisms) was different compared to control samples.  
 551

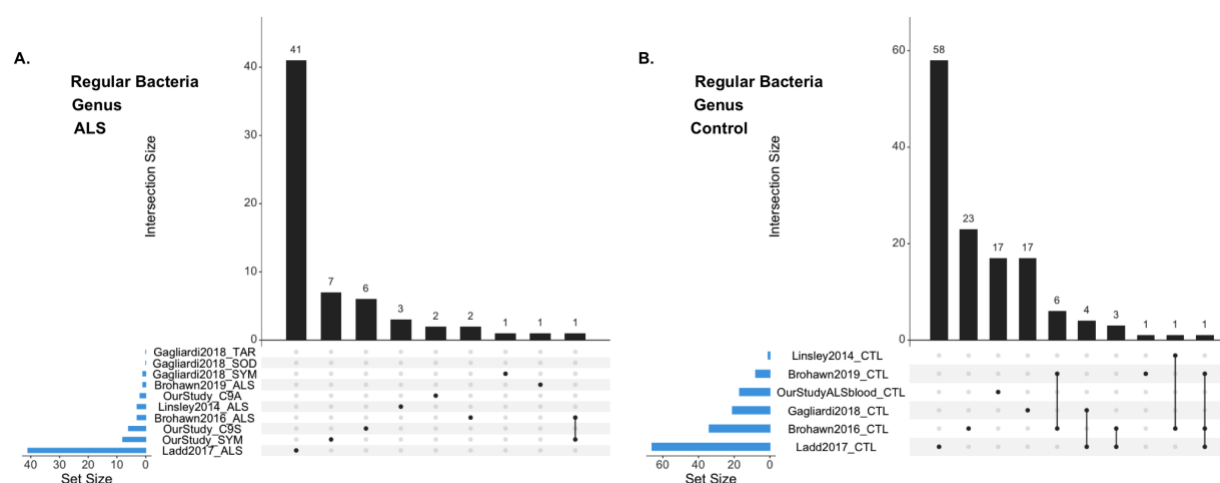

552  
 553 **Fig 7. Upset plots of overlapping genus between datasets in the regular biome for ALS or**  
 554 **controls.**

555 Upset plots are Venn diagram-like plots. A set refers to a contig that was assigned to a condition  
 556 from a dataset. Each set is on a row with total amounts in a set as a blue bar plot on the left (ordered  
 557 by set size). The black histogram on top shows the counts that are in the intersection of sets (a



558 single dot for one dataset or connected dots for overlap of multiple datasets). A. ALS contigs in  
559 the regular bacteriome. B. Control contigs from the regular bacteriome.

560

561

562

## Discussion

563

564 We have created Mystery Miner to search for and quantify known and unknown microbes  
565 in RNA-seq datasets as a tool for researchers to study dysbiosis and identify infectious agents. We  
566 validated the pipeline by recovering and quantifying *Chlamydia* and SARS-CoV reads from RNA-  
567 seq datasets from intentionally infected cells. Interestingly, we also identified *Mycoplasma* reads  
568 in the *Chlamydia* dataset, suggesting that Mystery Miner may also be able to identify unsuspected  
569 bacterial infections. We also use published data to investigate the difference of polyA vs total RNA  
570 recovery of bacterial species in multiple tissues. Perhaps surprisingly, we did not see a consistent  
571 difference in the recovery of bacterial reads between the two types of RNA-seq libraries,  
572 considering that bacterial transcripts are not expected to be polyadenylated. However, it is well-  
573 recognized that polyA selection is imperfect, and libraries constructed from polyA-selected RNA  
574 routinely contain transcripts thought not to be polyadenylated (e.g., rRNA). We also found  
575 increased recovery of bacterial species with globin RNA depletion in blood. This could be the  
576 result of an effective increase in read depth for bacteria when not sequencing globin, or an increase  
577 in contamination from the globin depletion step. We stress that our bioinformatic approach alone  
578 cannot distinguish between contamination and the true existence of microbial sequences in human  
579 tissue.

580 We then used Mystery Miner on Our Study dataset consisting of  $8.64 \times 10^9$  reads. This  
581 dataset was generated from whole blood total RNA that was depleted for both ribosomal and globin  
582 transcripts. It encompasses samples from controls, participants with a *C9ORF72* hexanucleotide  
583 expansion (symptomatic and pre-symptomatic), and *C9ORF72* negative ALS patients. We found  
584 no statistical difference in microbial sequence read coverage between controls and any class of  
585 ALS patients, examining either individual contigs or using various taxonomical binning  
586 approaches. We also did not detect any batch effects or obvious age- or sex- biases in the recovery  
587 of microbial reads (Figure S7). Overall, we found no evidence of blood microbial sequences  
588 contributing to either *C9ORF72* negative ALS or symptomatic patients harboring the *C9ORF72*  
589 hexanucleotide expansion. However, ALS is a CNS disease, so our findings in these blood samples  
590 do not necessarily preclude a role for microbes in this disease.

591

592 A unique aspect of Mystery Miner is that it tracks non-human reads that do not have  
593 significant BLASTN hits in GenBank. We were intrigued by the identification of a large contig  
594 (>5kb) in the dark biome of our ALS dataset that showed protein sequence similarity to RNA-  
595 dependent RNA polymerases, the essential replicase of RNA viruses. To validate that this virus-  
596 like sequence was not an artifact of contig assembly or a contaminant introduced during library  
597 construction or sequencing, we used RT-PCR of the original patient samples to demonstrate that  
598 this sequence was present in positive samples identified through the RNA-seq analysis and not  
599 detectable in negative samples. We cannot extrapolate from this specific example to determine  
600 what fraction of the "dark" and "double dark" sequences represent true novel microbial sequences  
601 present in human blood, but we note that analysis of human cell free blood DNA has reported the  
602 identification of thousands of novel bacterial sequences<sup>86</sup>. We suggest that Mystery Miner is a  
603 generally useful tool for the identification of novel microbial sequences in RNA-seq data.

604  
605 To extend our analysis we processed publicly available blood and spinal cord ALS datasets  
606 through our pipeline. As observed in our dataset, library size generally correlated with number of  
607 bacterial contigs assembled and number of bacterial genera/species recovered. When the microbial  
608 sequences we found in our dataset were compared to the other datasets we found similar  
609 genera/species and, not surprisingly, larger datasets generally had greater overlap. One dataset  
610 (Ladd2017) yielded comparable recovery of bacteria and viruses for the regular biome but a far  
611 greater recovery bacteria and viruses in the dark biome compared to all the other datasets. This  
612 study used laser capture microdissection (LCM) to isolate cervical spinal cord motor neurons and  
613 had comparable read amounts per sample to other studies and was conducted in the same  
614 laboratory as two other studies (Brohawn2016, Brohawn2019). We are unsure why this dataset  
615 yielded a much larger dark biome compared to the other datasets. Potentially these differences are  
616 a byproduct of using LCM to acquire samples.

617  
618 We then analyzed several publicly available ALS datasets for statistically significant  
619 differences between recovered microbial sequences in ALS and control samples. Only one dataset  
620 (Gagliardi2018) had any significant microbial sequence differences between control and ALS  
621 samples, specifically ALS patients with *FUS* or *SOD1* mutations. However, the sample number  
622 in this sub-study was small ( $N = 2-3$ ), and in the case of the *SOD1* patients the excess microbial  
623 reads were in the control samples. In the absence of additional information (e.g., batch assignments  
624 for the samples) it is difficult to conclude that these sequence/sample correlations are meaningful.  
625 Finally, we compared identified microbial sequences in the control and ALS samples across the  
626 datasets and did not identify any genera/species that were preferentially recovered in either sample  
627 type.

628  
629 Using our bioinformatic analysis pipeline Mystery Miner, we have not identified an  
630 association between ALS pathology and sequences corresponding to known or unknown microbial  
631 species. However, there are intrinsic limitations in using "repurposed" RNA-seq data to assay  
632 tissue-associated microbial sequences, including the relatively small number of non-human reads  
633 (<1% of total) upon which the analysis is based. This limited sequence signal could preclude  
634 identification of rarer microbes. Perhaps more problematic is the possibility that contaminating  
635 sequences obscure true tissue-associated microbial sequences. Any candidate microbes identified  
636 using Mystery Miner that correlate with human phenotypes will necessarily require independent  
637 validation. Despite these limitations, we believe Mystery Miner will be a useful tool for future  
638 researchers investigating known and unknown microbes that could contribute to disease, as our  
639 analyses have shown it to be sensitive to bacterial/viral agents in sequencing data.

640  
641  
642  
643

#### 644 **Acknowledgements**

645 We thank the Jackson Laboratories for globin depletion and RNA-seq to generate Our Study  
646 dataset. This work was supported by the NIH (NS063964, to CL); the ALS Association (ALSA,  
647 to LP; #WA1096 and 16-IIP-253 to MP; and #2015 to MB); NINDS (R35NS097273,  
648 P01NS084974, to LP); the Mayo Clinic Foundation (to LP); Neuroscience Focused Research  
649 Team Mayo Clinic grant (to MP); the Association of Frontotemporal Dementia (AFTD, to LP);

650 the Alzheimer's Association-AD Strategic Fund (to LP); the Muscular Dystrophy Association  
 651 (MDA #172123 to MB); the ALS Recovery Fund (to MB); Kimmelman Estate (to MB); and the  
 652 Department of Defense (Chem-Bio Diagnostics program Grant HDTRA-1-18-1-0032 to RDD).

653  
 654

| Condition | Sample   | GAPDH RT-PCR Ct Value | RDRP RT-PCR Ct Value | RDRP RNA-seq Normalized Coverage |
|-----------|----------|-----------------------|----------------------|----------------------------------|
| SYM       | LP00274  | 20.562019             | 36.401               | 1.56                             |
| C9S       | LP00041  | 20.783213             | 36.346               | 3.39                             |
| C9S       | LP00192  | 20.899612             | 35.636               | 0.67                             |
| C9A       | LP000180 | 19.982108             | 34.832               | 1.11                             |
| C9S       | LP000183 | 20.176418             | undetermined         | 0                                |
| C9S       | LP000197 | 20.125161             | undetermined         | 0                                |
| C9A       | LP000157 | 20.062433             | undetermined         | 0                                |

655  
 656  
 657  
 658  
 659  
 660  
 661  
 662  
 663  
 664  
 665  
 666  
 667  
 668  
 669  
 670  
 671  
 672

**TABLE 1. RT-PCR AND NORMALIZED COVERAGE RESULTS FOR RDRP CONTIG**

Quantitative RT-PCR and normalized coverage results from the 5180 bp RDRP contig. For the RDRP contig positive samples (top 4) with high normalized coverage and detectable Ct values and negative samples (bottom 3) with no normalized coverage and undetectable Ct values. GAPDH was used as a positive control for qRT-PCR and shows comparable levels for all samples. These samples were from three conditions *C9ORF72* negative ALS symptomatic patients (SYM), *C9ORF72* positive ALS symptomatic patients (C9S) and *C9ORF72* positive asymptomatic individuals (C9A).

| <b>Name</b>          | <b>Groups</b>                                                                                                                                           | <b># Samples</b> | <b>Tissue</b>                              | <b>Pulldown</b>                                   |
|----------------------|---------------------------------------------------------------------------------------------------------------------------------------------------------|------------------|--------------------------------------------|---------------------------------------------------|
| <b>Humphrys2016</b>  | <b>1- or 24-hours post infection with <i>Chlamydia trachomatis</i></b>                                                                                  | <b>12</b>        | <b>Cultured epithelial cell monolayers</b> | <b>PolyA<br/>Total RNA</b>                        |
| <b>VonSchack2018</b> | <b>PolyA or Total RNA from blood or colon</b>                                                                                                           | <b>16</b>        | <b>Whole Blood<br/>Colon</b>               | <b>PolyA RNA<br/>Total RNA</b>                    |
| <b>Shin2014</b>      | <b>Globin depleted<br/>Not globin depleted</b>                                                                                                          | <b>24</b>        | <b>Whole Blood</b>                         | <b>Total RNA</b>                                  |
| <b>Emanuel2020</b>   | <b>Severe acute respiratory syndrome coronavirus 1 or 2 infection<br/>Controls</b>                                                                      | <b>18</b>        | <b>Calu3 cells</b>                         | <b>Total RNA</b>                                  |
| <b>Our Study</b>     | <b><i>C9ORF72</i> negative ALS,<br/><i>C9ORF72</i> positive and symptomatic ALS,<br/><i>C9ORF72</i> positive asymptomatic participants<br/>Controls</b> | <b>120</b>       | <b>Whole Blood</b>                         | <b>Total RNA<br/>hemoglobin and rRNA depleted</b> |
| <b>Linsley2014</b>   | <b>ALS<br/>type 1 diabetes,<br/>sepsis,<br/>multiple sclerosis patients before and 24 hours after the first treatment with IFN-beta<br/>Controls</b>    | <b>134</b>       | <b>Whole blood</b>                         | <b>Total RNA</b>                                  |
| <b>Gagliardi2018</b> | <b>Sporadic ALS,<br/>ALS with mutations in <i>FUS</i>, <i>SOD1</i>, <i>TARDBP</i><br/>Controls</b>                                                      | <b>20</b>        | <b>Peripheral blood mononuclear cells</b>  | <b>Total RNA</b>                                  |
| <b>Brohawn2016</b>   | <b>ALS<br/>Controls</b>                                                                                                                                 | <b>15</b>        | <b>Cervical spinal cord</b>                | <b>Total RNA<br/>rRNA depleted</b>                |

|                    |                                                                         |           |                                                                                          |                  |
|--------------------|-------------------------------------------------------------------------|-----------|------------------------------------------------------------------------------------------|------------------|
| <b>Ladd2017</b>    | <b>ALS Controls</b>                                                     | <b>10</b> | <b>Laser capture microdissection (LCM) to isolate cervical spinal cord motor neurons</b> | <b>Total RNA</b> |
| <b>Brohawn2019</b> | <b>ALS, Alzheimer's disease (AD), Parkinson's disease (PD) Controls</b> | <b>53</b> | <b>Cervical spinal cord</b>                                                              | <b>Total RNA</b> |

673  
674  
675  
676  
677  
678  
679  
680  
681  
682

**TABLE 2. STUDY DESIGN FOR DATASETS USED IN THIS PAPER**

Overview of the datasets used in this paper. The first three studies are only used to validate our pipeline. The six subsequent studies are ALS related from both blood and spinal cord.

**Supplemental Figures**

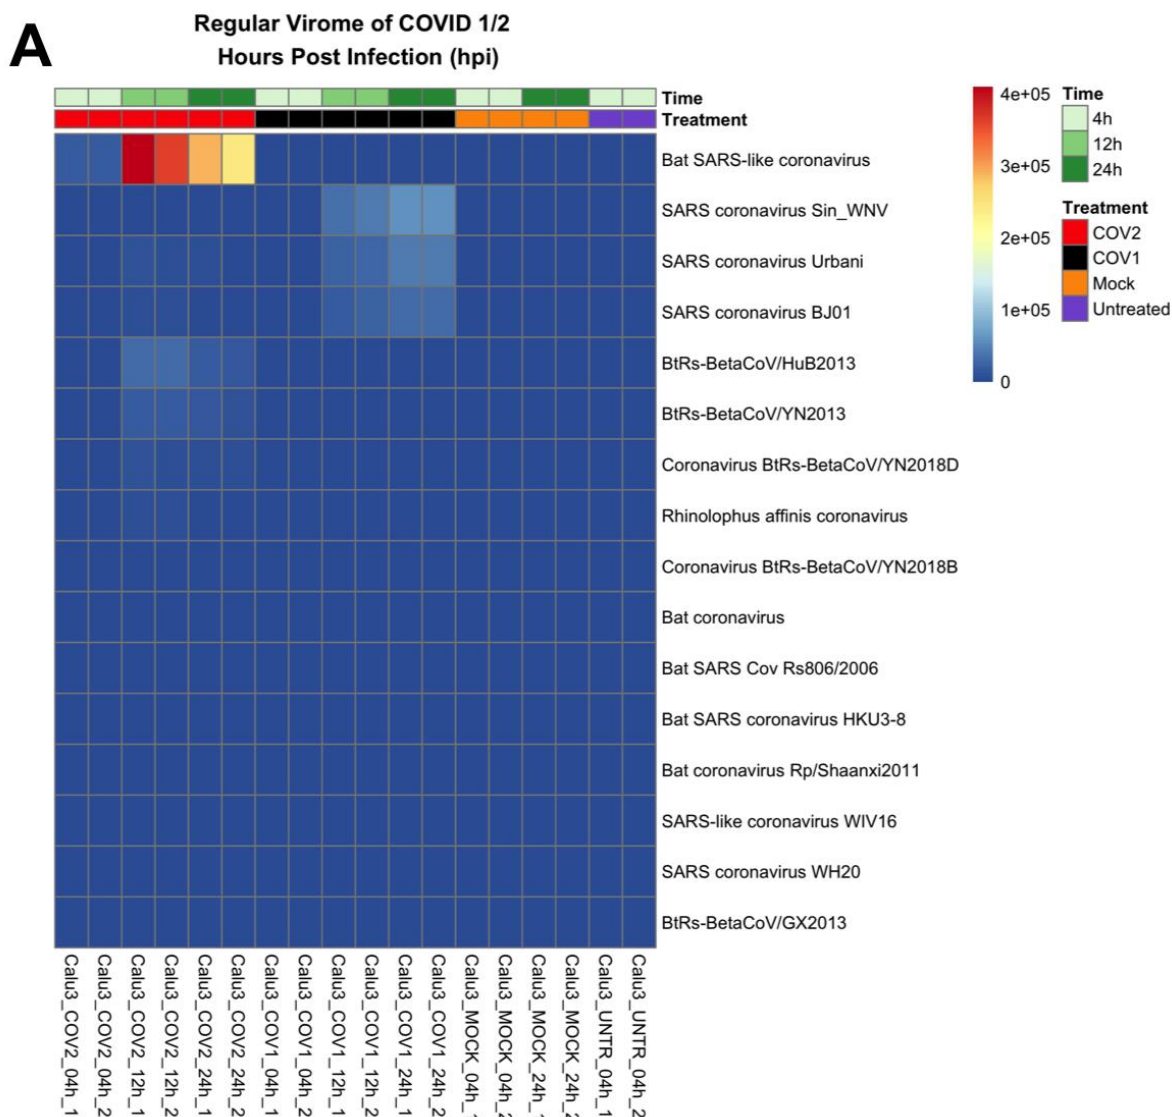

683  
684

685 **Figure S1. Heatmap of normalized coverage of regular Virome from Emanuel2020 with**  
686 **BLAST to nt database from 05/10/2019**

687 Heatmap of normalized coverage of dark biome contigs binned by species (top 30 species). The  
688 nucleotide database was from 5/10/2019 before the discovery of SARS-CoV-2. The top row  
689 shows the same row from the main text but identified as a bat SARS like coronavirus.

690  
691  
692  
693  
694  
695  
696

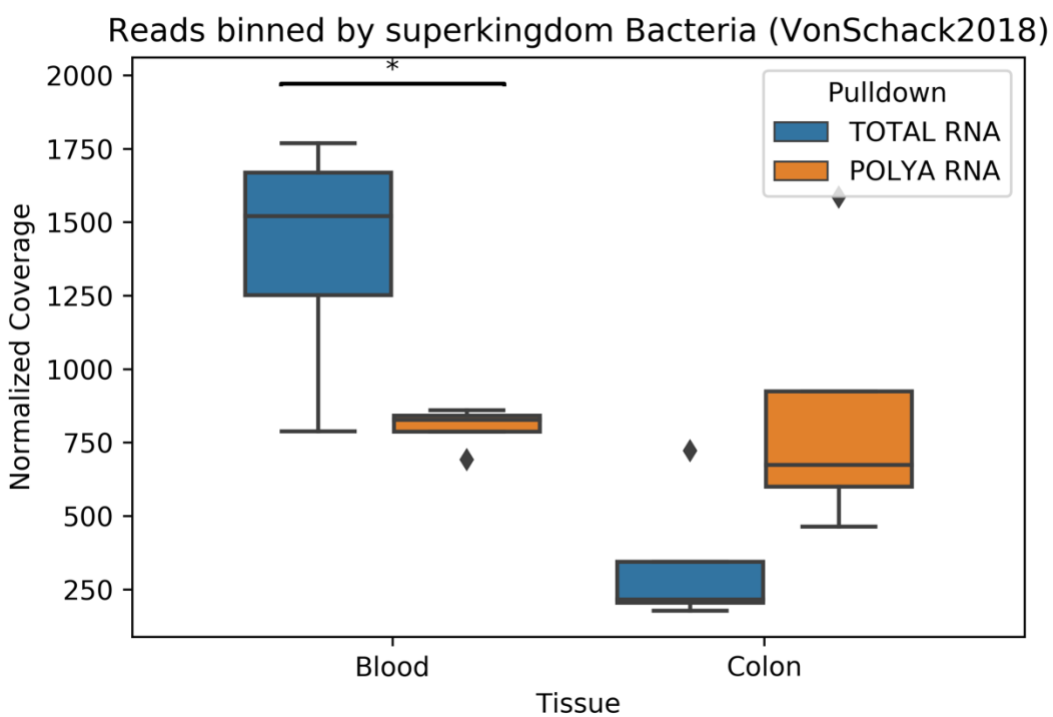

697  
698  
699  
700  
701  
702  
703  
704

**Figure S2. Boxplot of normalized coverage for superkingdom Bacteria in VonSchack2018**  
Boxplot of normalized coverage of regular biome contigs binned by superkingdom Bacteria.  
Blood shows significantly more reads in total RNA vs polyA RNA compared to Colon tissue.

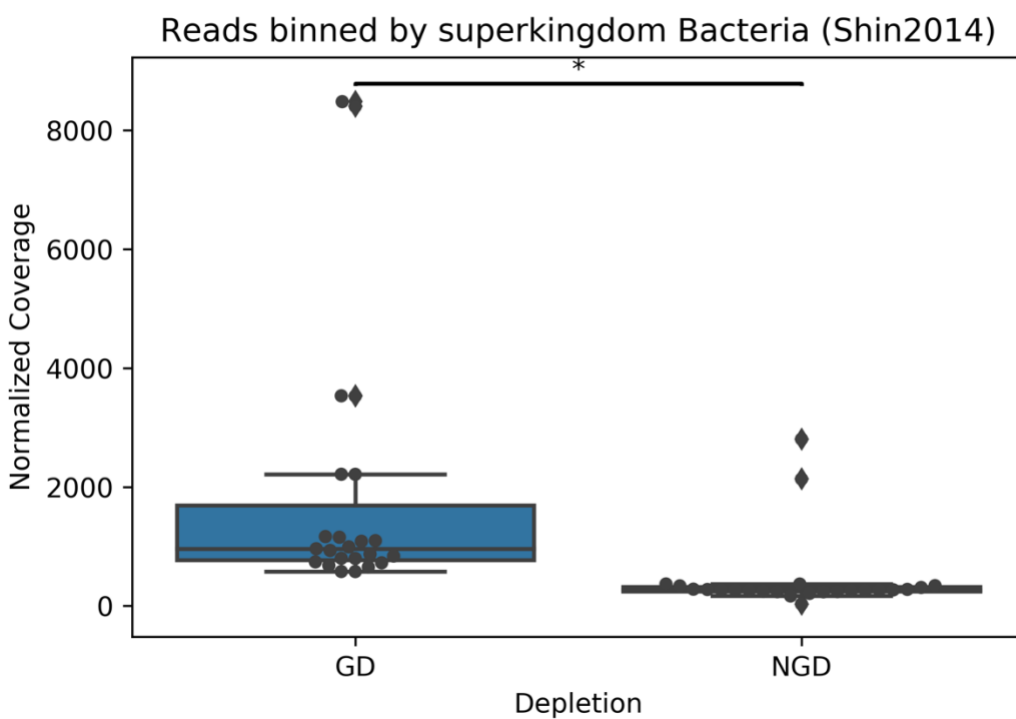

705  
706 **Figure S3. Boxplot of normalized coverage for superkingdom Bacteria in Shin2014**  
707 Boxplot of normalized coverage of regular biome contigs binned by superkingdom Bacteria.  
708 Globin depletion (GD) has significantly more coverage than non-globin depleted (NGD) blood.  
709  
710  
711



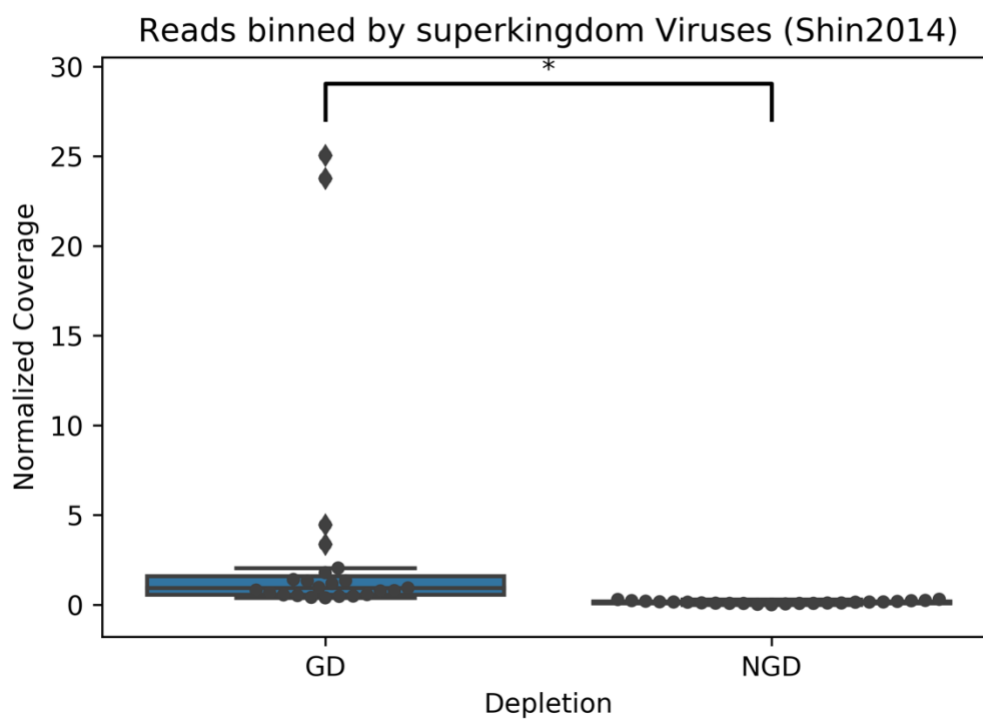

712  
713  
714  
715  
716

**Figure S4. Boxplot of normalized coverage for superkingdom Viruses in Shin2014**

Boxplot of normalized coverage of regular biome contigs binned by superkingdom Viruses.

Globin depletion (GD) has significantly more coverage than non-globin depleted (NGD) blood.

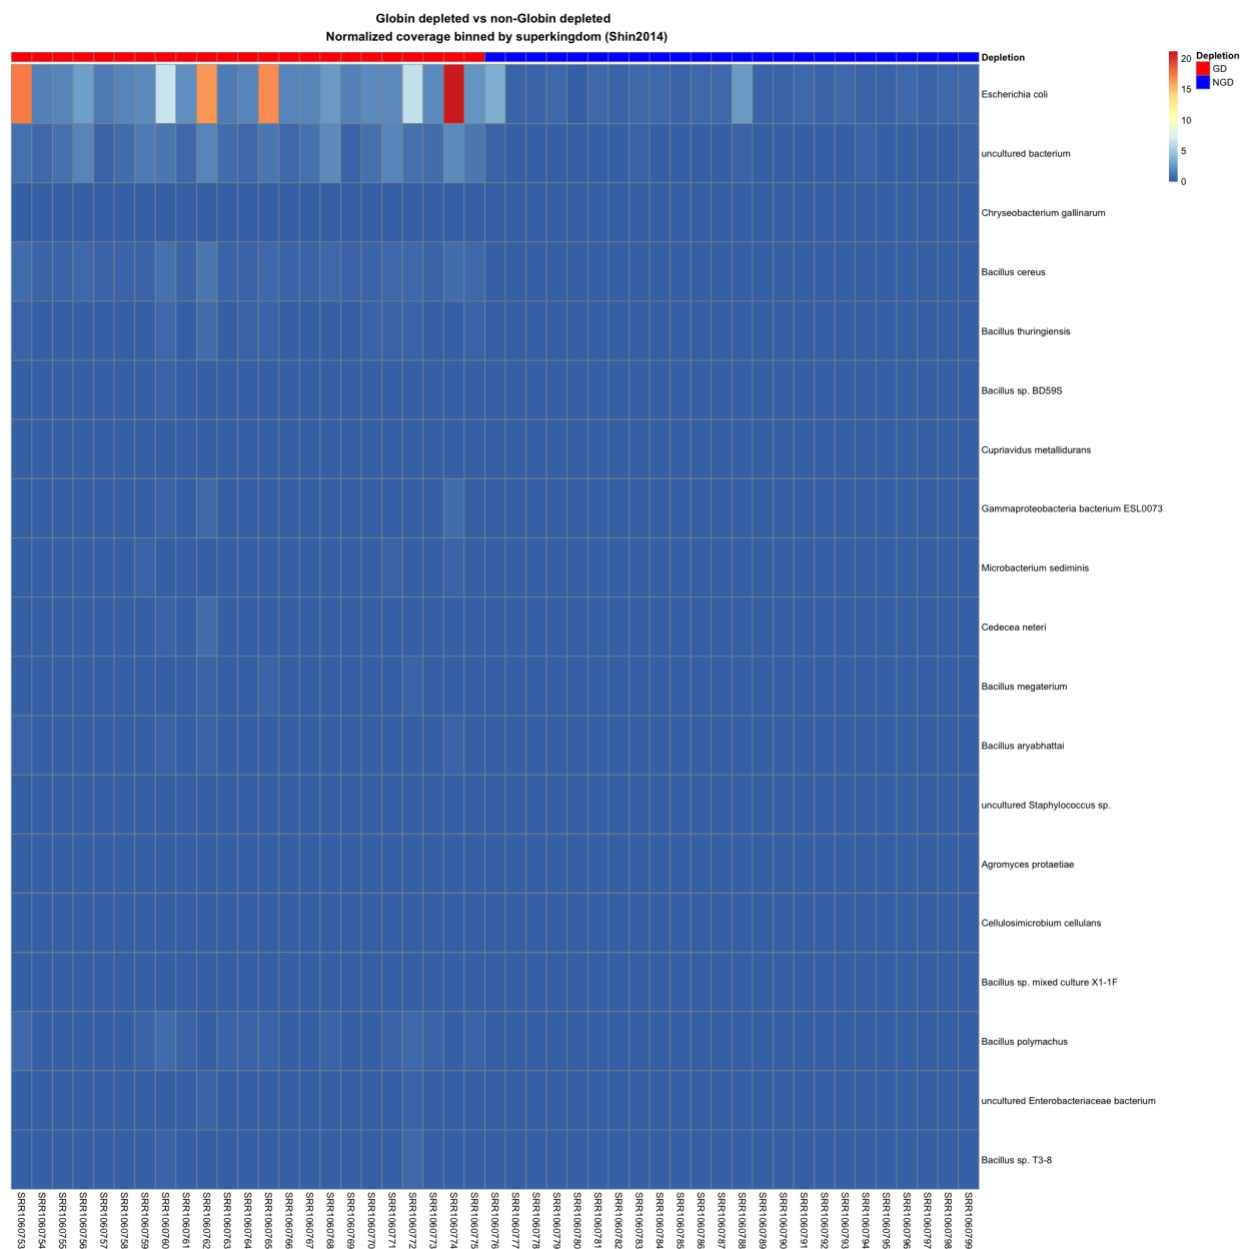

717 **Figure S5. Heatmap of normalized coverage of regular Bacteriome binned by species from**  
718 **Shin2014**

720 Heatmap of normalized coverage of regular biome contigs binned by bacteria species (top 20  
721 species shown for brevity). Globin depletion (GD) is red and non-globin depletion is blue  
722 (NGD).  
723

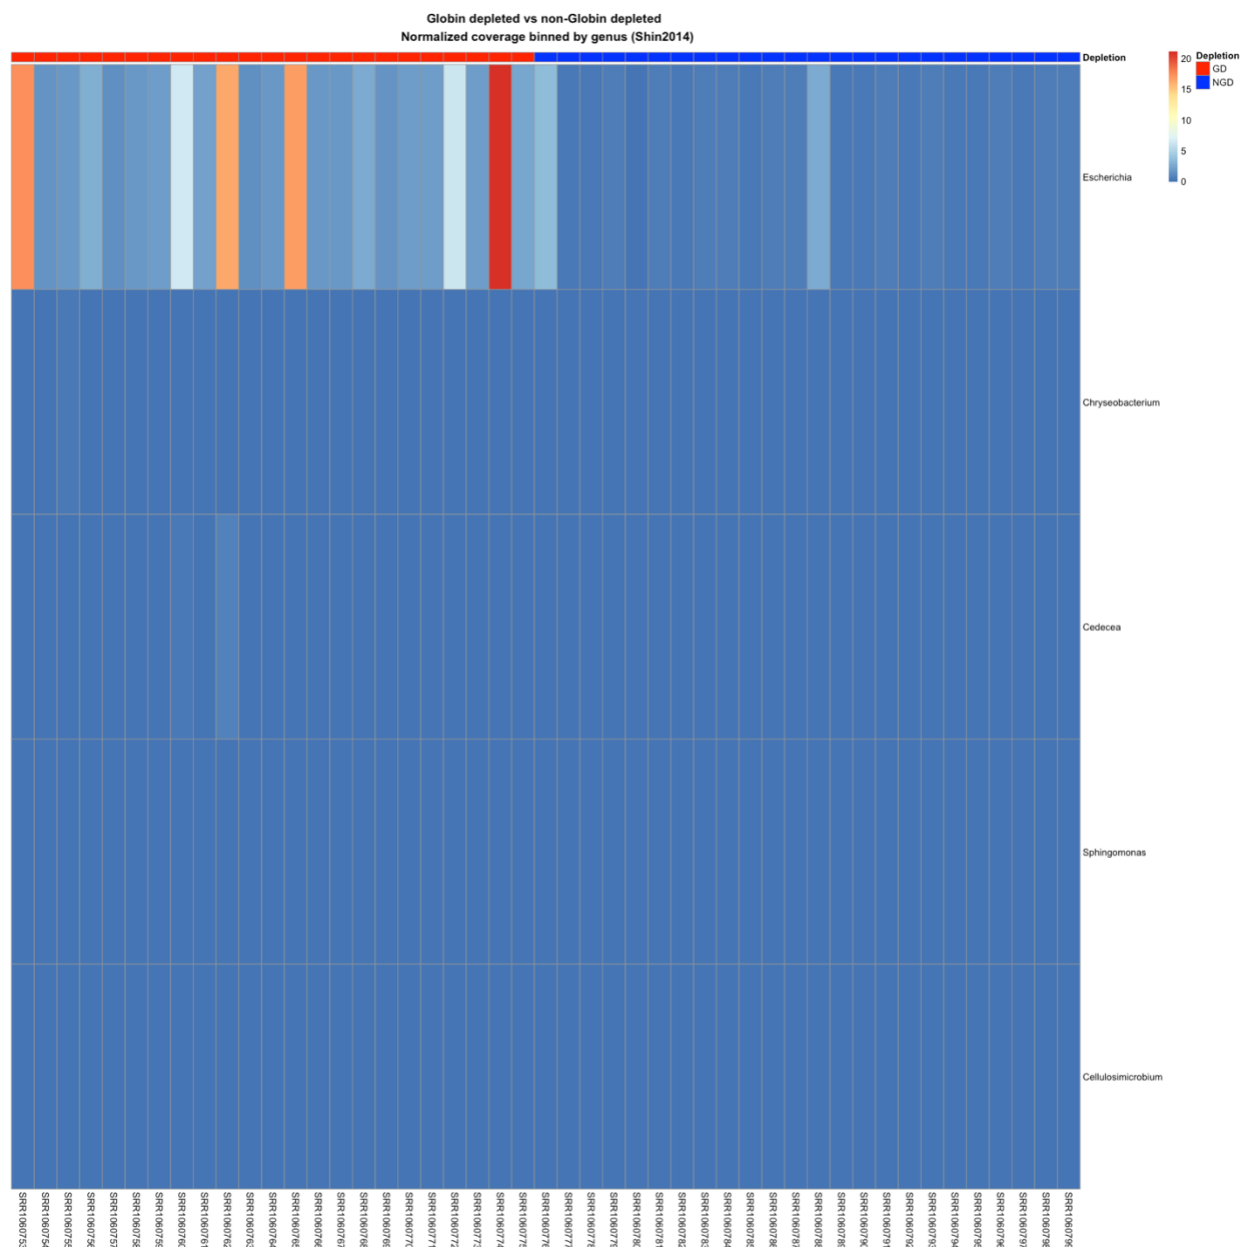

724  
725  
726  
727  
728  
729  
730  
731

**Figure S5. Heatmap of normalized coverage of regular Bacteriome binned by genus from Shin2014**

Heatmap of normalized coverage of regular biome contigs binned by bacteria genus. Globin depletion (GD) is red and non-globin depletion is blue (NGD).

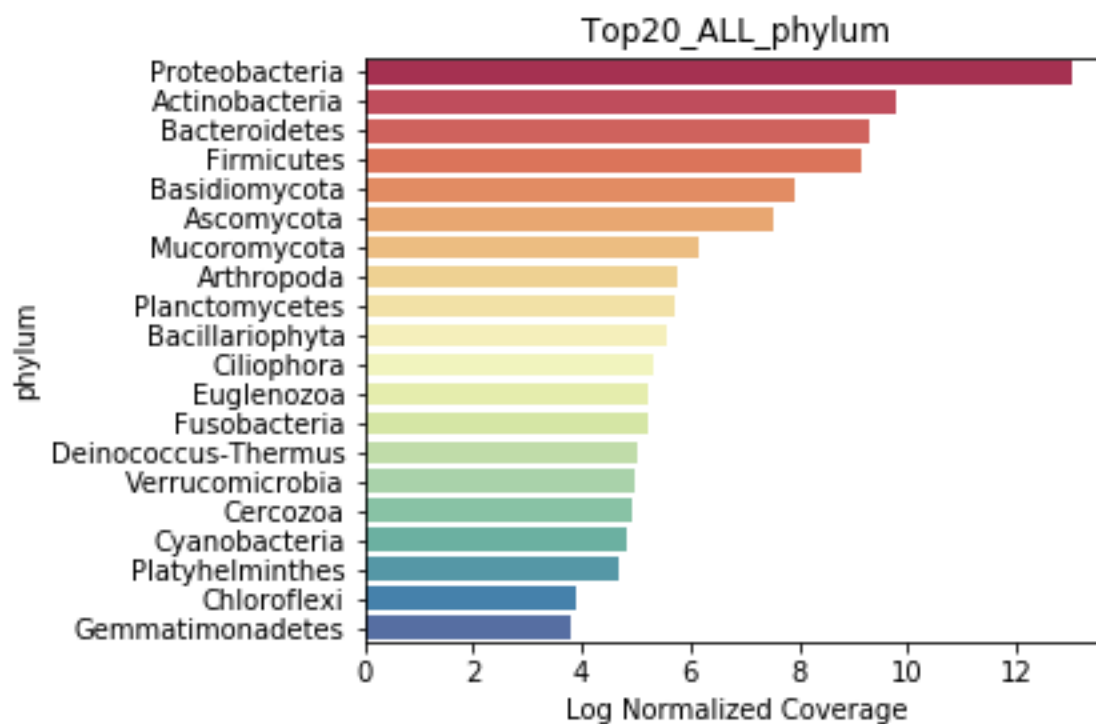

732  
733  
734  
735  
736  
737  
738  
739  
740

**Figure S6. Log coverage binned by phylum from our ALS dataset**

Coverage is summed for all of the samples and *alpha proteo-bacteria*, *Actinobacteria*, *Firmicutes*, and *Bacteroidetes* are the most highly represented.

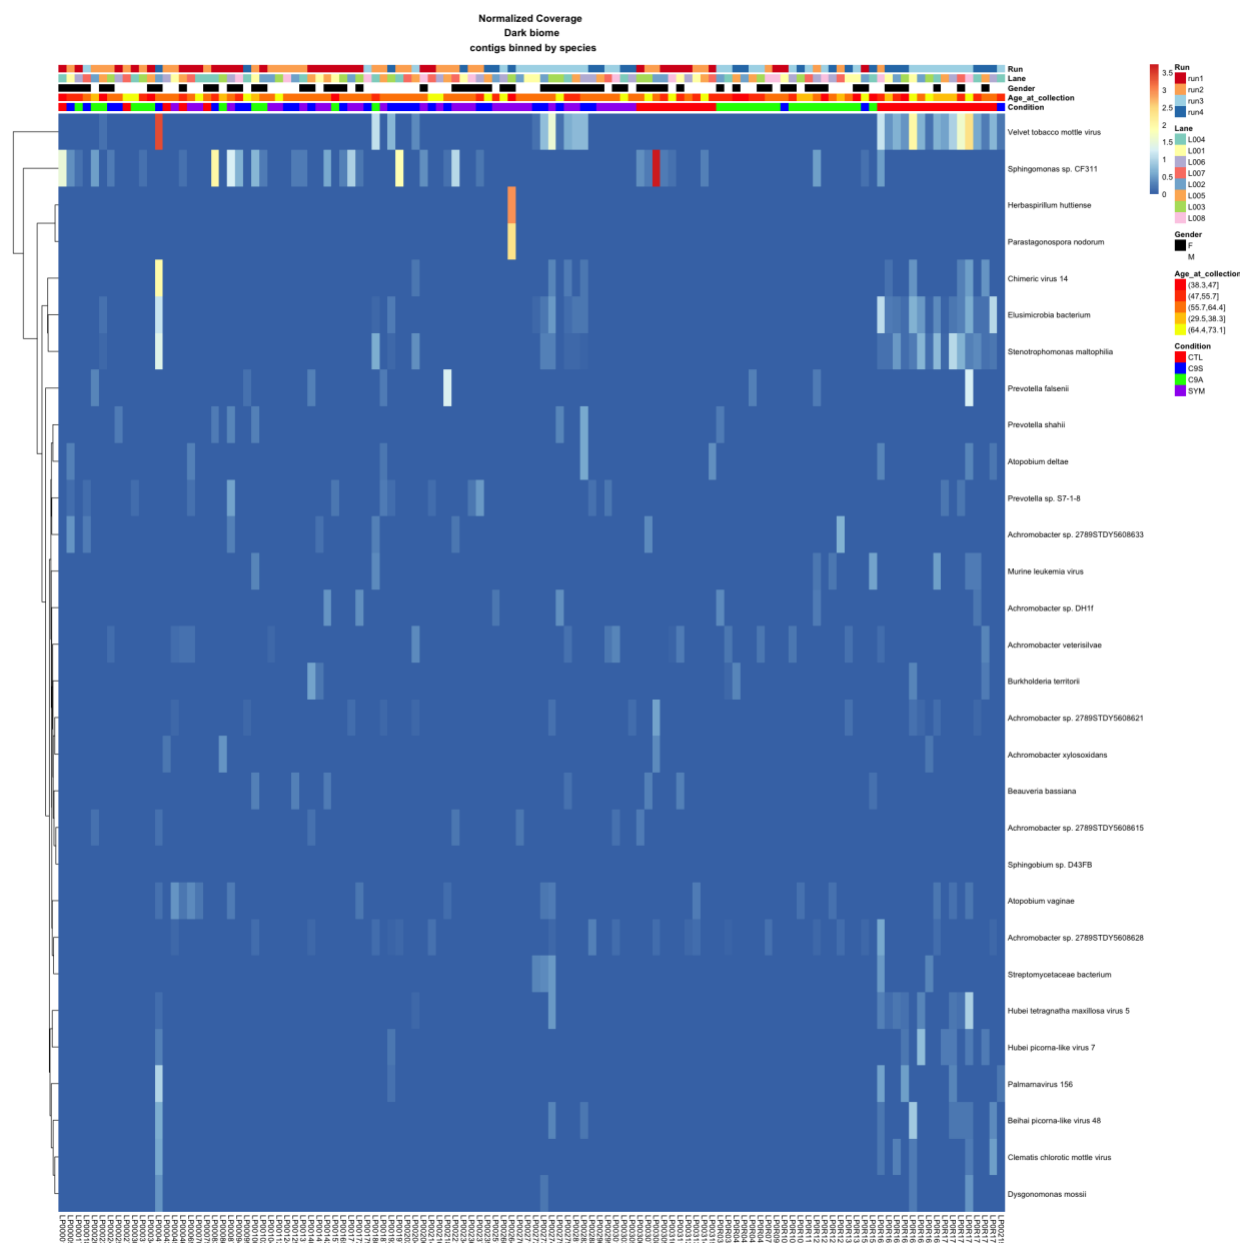

741  
 742 **Figure S7. Heatmap of normalized coverage of dark biome contigs binned by species with**  
 743 **metadata**  
 744 Heatmap of normalized coverage of dark biome contigs binned by species (top 30 species shown  
 745 for brevity). The highest coverage belongs to contigs that show high similarity to velvet tobacco  
 746 mottle virus. Zero coverage is blue and goes to red with increasing values. These samples were  
 747 from four conditions including control patients [(CTL) green], ALS symptomatic patients  
 748 [(SYM) purple], C9-ORF positive ALS symptomatic patients [(C9S) blue] and C9-ORF positive  
 749 asymptomatic patients [(C9A) red]. Other metadata include gender, lane, run, and age at  
 750 collection.  
 751

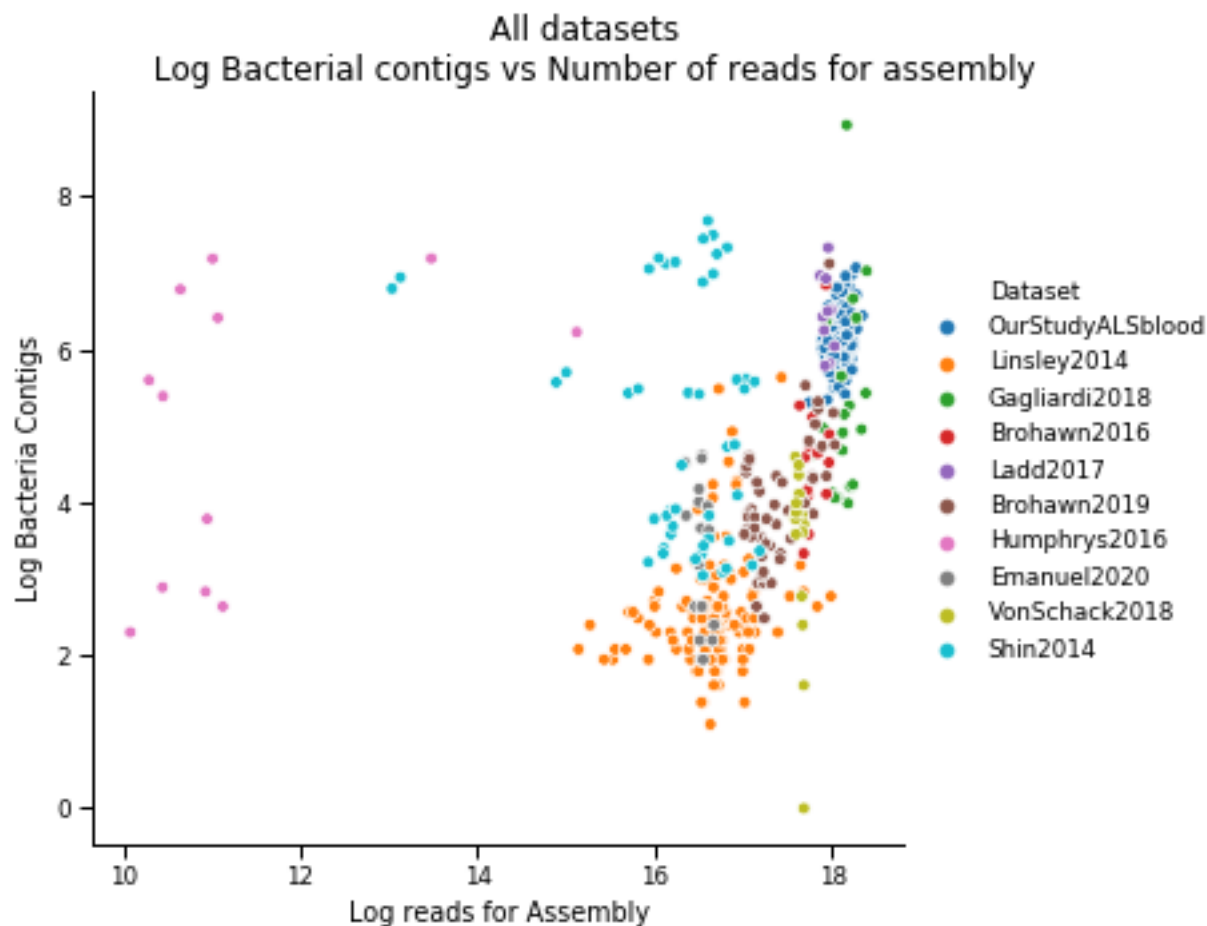

752  
753  
754  
755  
756  
757  
758  
759  
760

**Figure S8. Log Bacterial contigs vs log reads for Assembly.** Scatterplot where each dot is a sample from a dataset with log number of Bacterial contigs assembled on the Y-axis and Log reads used in SPAdes on the X-axis. Aside from the Shin, Humphrys, and Emanuel datasets there is a general trend of increased number of bacterial contigs with amount of reads.

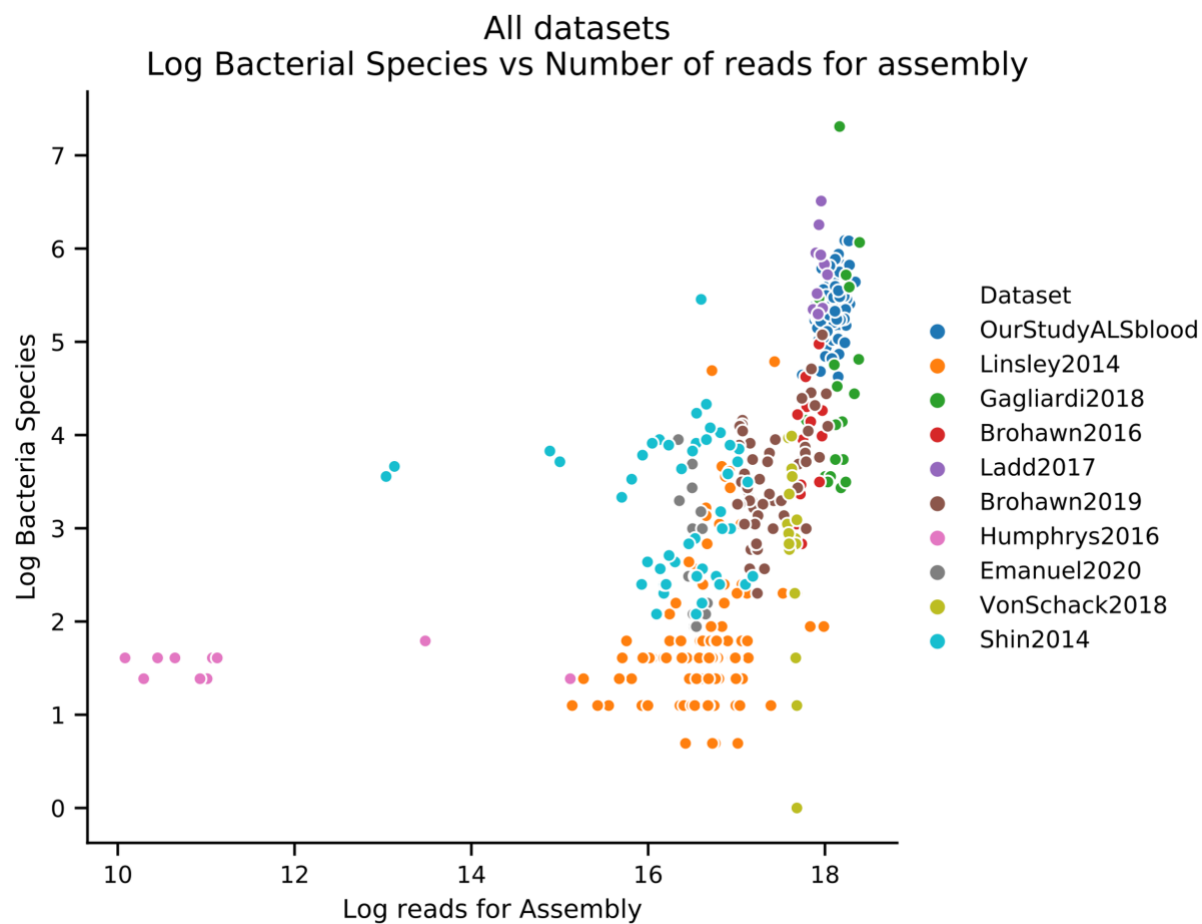

761  
762  
763  
764  
765  
766  
767  
768  
769  
770  
771  
772

**Figure S9. Log number of bacterial species vs log reads for Assembly.** Scatterplot where each dot is a sample from a dataset with log number of number of bacterial species detected on the Y-axis and Log reads used in SPAdes on the X-axis.

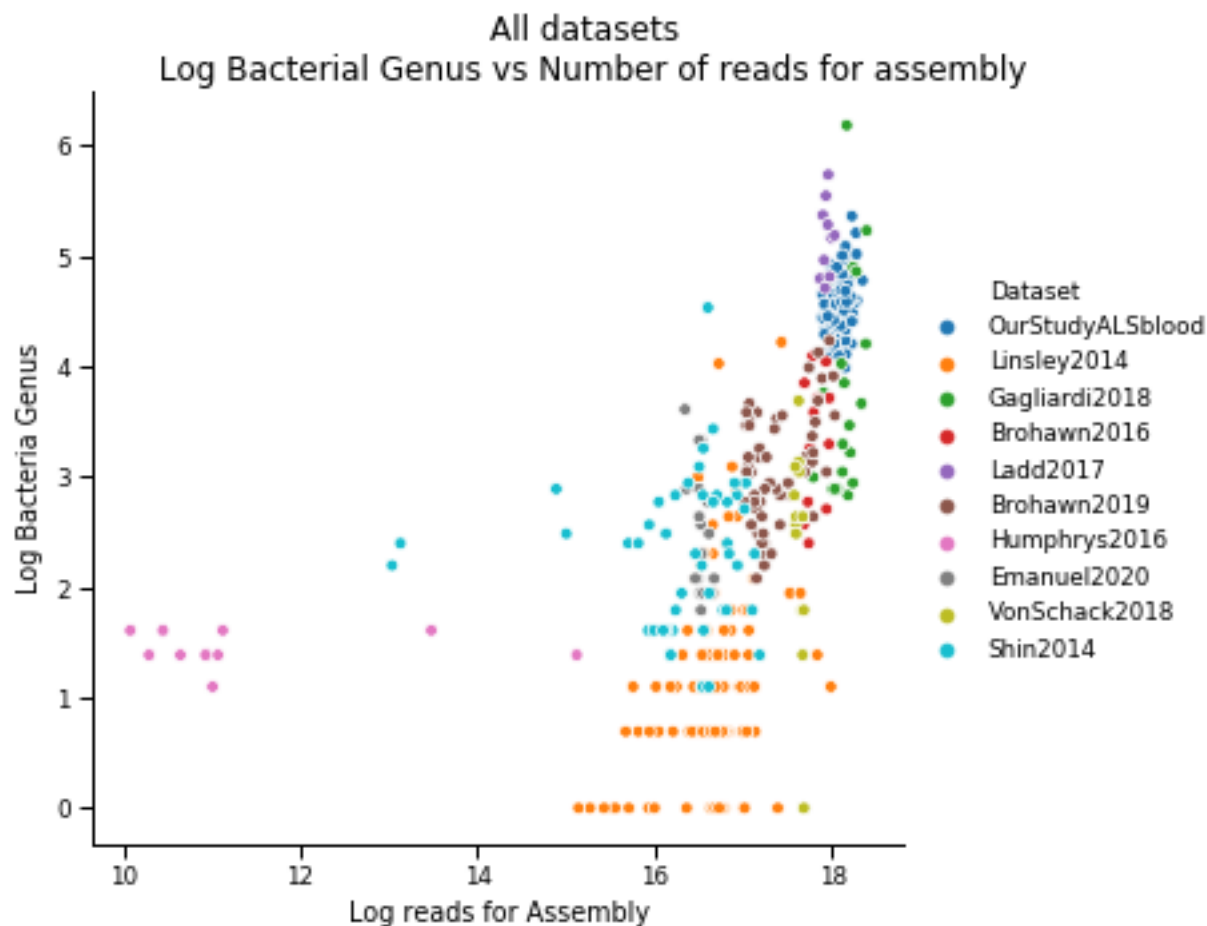

773  
774 **Figure S10. Log number of bacterial genus vs log reads for Assembly.** Scatterplot where each  
775 dot is a sample from a dataset with log number of number of bacterial genus detected on the Y-  
776 axis and Log reads used in SPAdes on the X-axis.

777  
778  
779  
780  
781  
782  
783  
784  
785  
786  
787



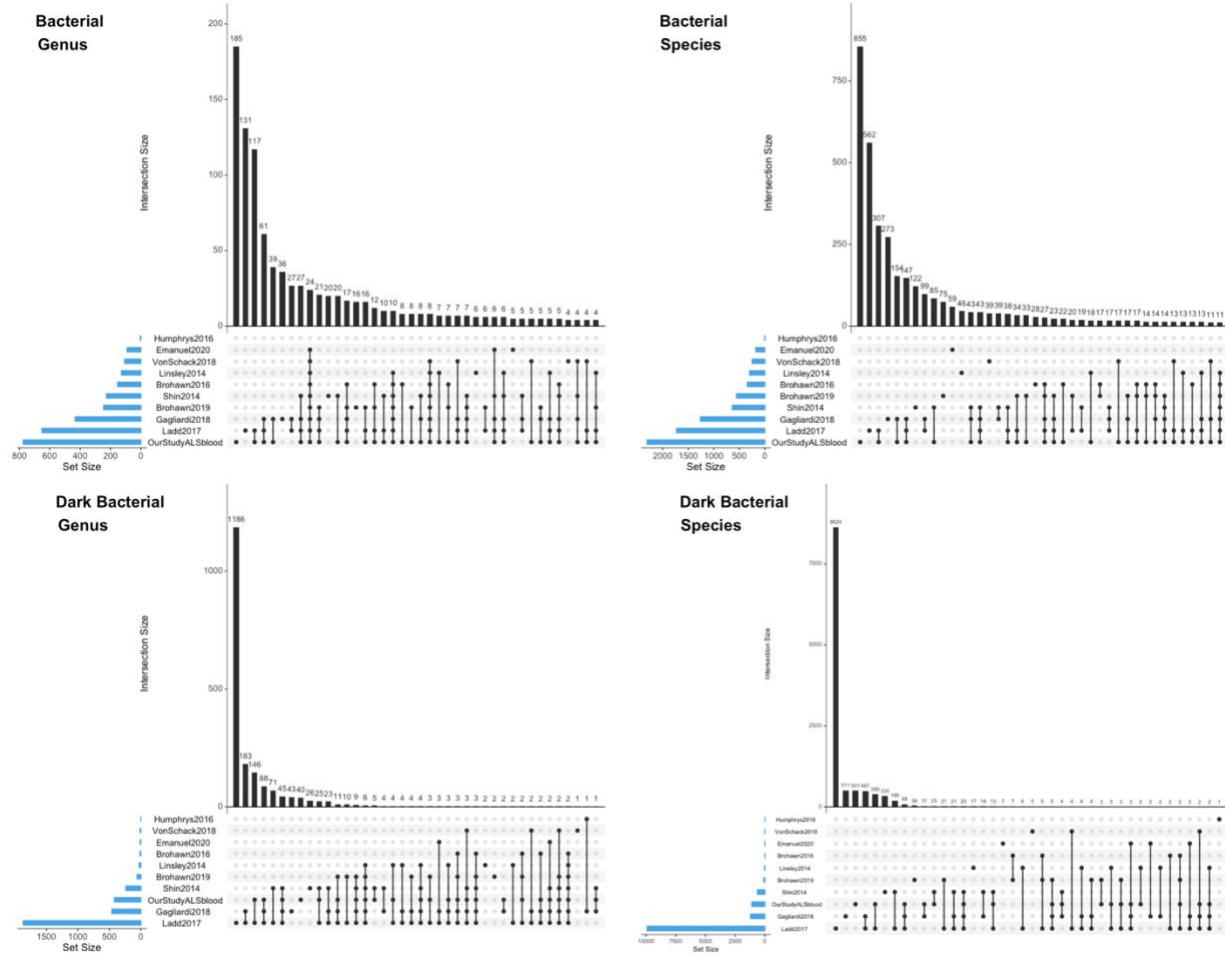

788  
789  
790  
791  
792  
793  
794  
795  
796  
797  
798  
799  
800  
801

**Figure S11. Upset plots of Bacteria for genus/species of regular/dark genome**

Upset plots are venn diagram-like plots. Each set is on a row with total amounts in a set as a blue bar plot on the left. The black histogram on top shows the counts that are in the intersection of sets (a single dot for one set or connected dots for multiple sets). The highest number of overlapping bacterial genus is between our dataset and Ladd2017 (133) followed by the intersection between our dataset, Ladd2017 and Gagliardi2018 (61) and there is a modest overlap (24) for 9/10 datasets. This is roughly similar in the Bacterial species figure and in general the larger datasets have more unique and the highest number of overlap.

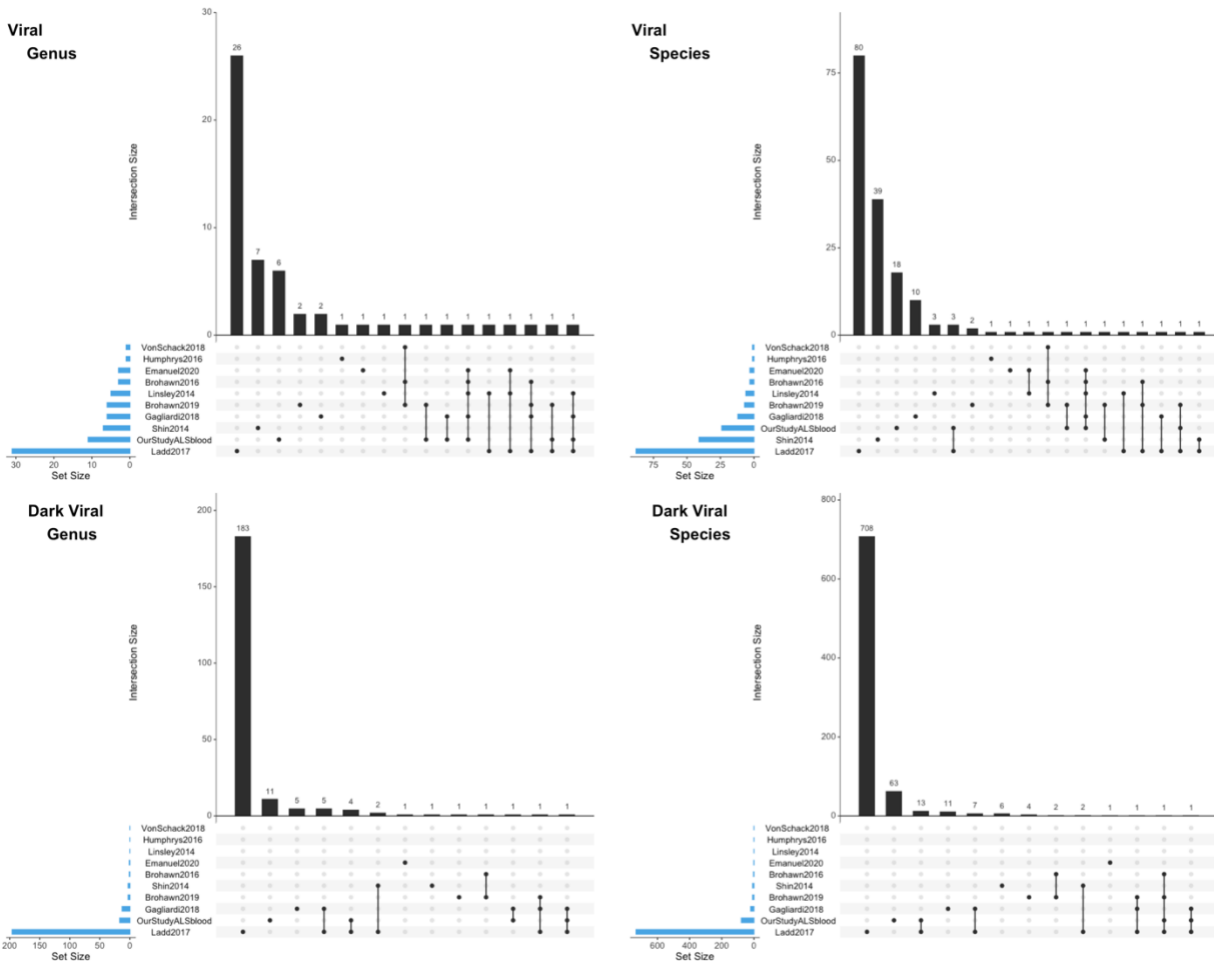

802  
803  
804  
805  
806  
807  
808  
809  
810  
811  
812

**Figure S12. Upset plots of Viruses for genus/species of regular/dark genome**

Upset plots are venn diagram-like plots. Each set is on a row with total amounts in a set as a blue bar plot on the left. The black histogram on top shows the counts that are in the intersection of sets (a single dot for one set or connected dots for multiple sets). The regular virome of each dataset is relatively unique with very low amounts of overlap ( $\leq 3$ ) between datasets (species and genus shows a similar pattern). Interestingly, the highest overlap for species in the dark virome is between our dataset and Ladd2017 (13).

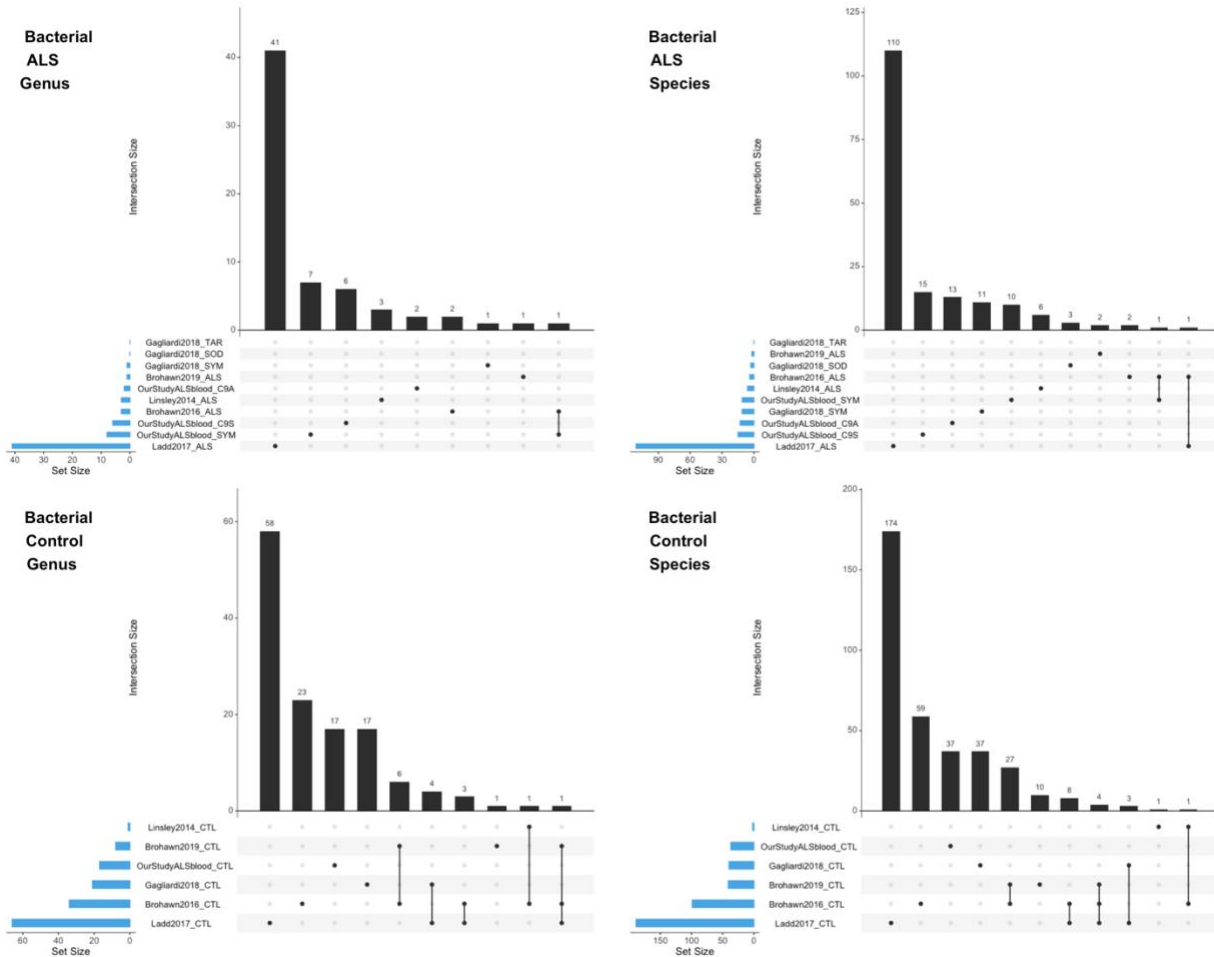

813  
814  
815  
816  
817  
818  
819  
820  
821  
822  
823  
824  
825

**Figure S13. Upset plots of Bacteria in the regular biome for genus/species in ALS and Control contigs**

Upset plots are venn diagram-like plots. Each set is on a row with total amounts in a set as a blue bar plot on the left. The black histogram on top shows the counts that are in the intersection of sets (a single dot for one set or connected dots for multiple sets). We assigned a contig to a condition if  $\geq 2$  samples from that condition contain at least 90% of the summed normalized coverage (from all samples) to the contig. In the genus and species from ALS samples there is a low amount of overlap between datasets ( $\leq 1$ ). When we look at control samples there is a much higher overlap for both genus and species.

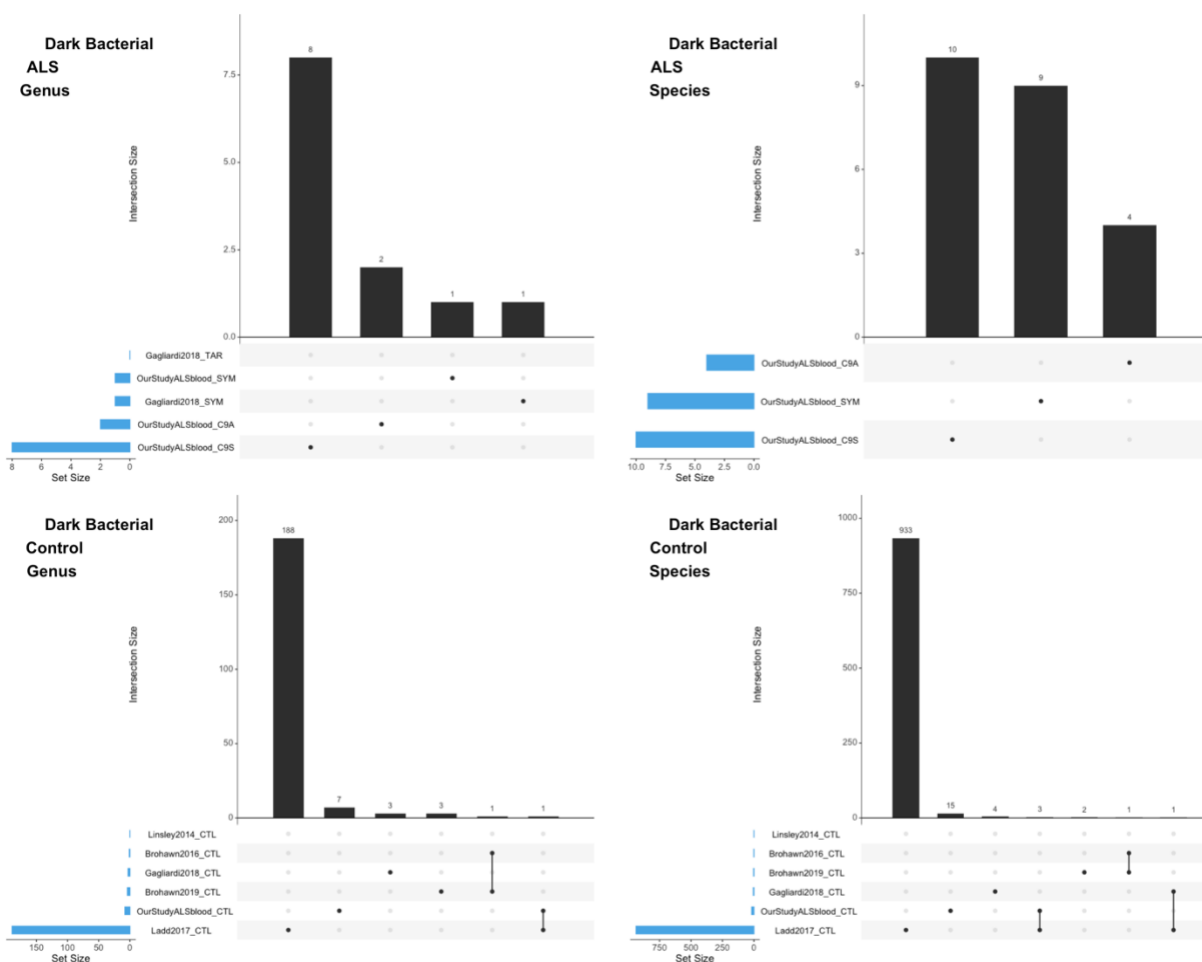

826  
827  
828  
829  
830  
831  
832  
833  
834  
835  
836  
837  
838  
839  
840  
841  
842  
843  
844  
845  
846

**Figure S13. Upset plots of Bacteria in the dark biome for genus/species in ALS and Control contigs**

Upset plots are venn diagram-like plots. Each set is on a row with total amounts in a set as a blue bar plot on the left. The black histogram on top shows the counts that are in the intersection of sets (a single dot for one set or connected dots for multiple sets). We assigned a contig to a condition if  $\geq 2$  samples from that condition contain at least 90% of the summed normalized coverage (from all samples) to the contig. Conditions with no recovered viruses have been omitted for clarity. Similarly to the regular bacteriome, there is no overlap in ALS samples and a small amount of overlap in the conditions.

847  
848  
849  
850  
851  
852  
853  
854  
855  
856  
857  
858  
859  
860  
861  
862  
863  
864  
865  
866  
867  
868  
869  
870  
871  
872  
873  
874  
875  
876  
877  
878  
879  
880  
881  
882  
883  
884  
885  
886  
887  
888  
889  
890

## References

1. Patrick KL, Bell SL, Weindel CG, Watson RO. Exploring the “multiple-hit hypothesis” of neurodegenerative disease: Bacterial infection comes up to bat. *Front Cell Infect Microbiol.* 2019. doi:10.3389/fcimb.2019.00138
2. Castanedo-Vazquez D, Bosque-Varela P, Sainz-Pelayo A, Riancho J. Infectious agents and amyotrophic lateral sclerosis: another piece of the puzzle of motor neuron degeneration. *J Neurol.* 2019. doi:10.1007/s00415-018-8919-3
3. Mehta P, Kaye W, Raymond J, et al. Prevalence of amyotrophic lateral sclerosis — United States, 2015. *Morb Mortal Wkly Rep.* 2018;67(46):1285-1289. doi:10.15585/mmwr.mm6746a1
4. Talbott EO, Malek AM, Lacomis D. The epidemiology of amyotrophic lateral sclerosis. In: *Handbook of Clinical Neurology.* Vol 138. Elsevier B.V.; 2016:225-238. doi:10.1016/B978-0-12-802973-2.00013-6
5. Ingre C, Roos PM, Piehl F, Kamel F, Fang F. Risk factors for amyotrophic lateral sclerosis. *Clin Epidemiol.* 2015. doi:10.2147/CLEP.S37505
6. Zhan Y, Fang F. Smoking and amyotrophic lateral sclerosis: A mendelian randomization study. *Ann Neurol.* 2019. doi:10.1002/ana.25443
7. Opie-Martin S, Wootton RE, Budu-Aggrey A, et al. Relationship between smoking and ALS: Mendelian randomisation interrogation of causality. *J Neurol Neurosurg Psychiatry.* 2020. doi:10.1136/jnnp-2020-323316
8. Kohne DE, Gibbs CJ, White L, Tracy SM, Meinke W, Smith RA. Virus detection by nucleic acid hybridization: Examination of normal and ALS tissues for the presence of poliovirus. *J Gen Virol.* 1981;56(2):223-233. doi:10.1099/0022-1317-56-2-223
9. Pertschuk LP, Broome JD, Brigati DJ, et al. JEJUNAL IMMUNOPATHOLOGY IN AMYOTROPHIC LATERAL SCLEROSIS AND MULTIPLE SCLEROSIS IDENTIFICATION OF VIRAL ANTIGENS BY IMMUNOFLUORESCENCE. *Lancet.* 1977;309(8022):1119-1123. doi:10.1016/S0140-6736(77)92382-0
10. Xue YC, Feuer R, Cashman N, Luo H. Enteroviral Infection: The Forgotten Link to Amyotrophic Lateral Sclerosis? *Front Mol Neurosci.* 2018;11:63. doi:10.3389/fnmol.2018.00063
11. Alonso R, Pisa D, Fernández-Fernández AM, Rábano A, Carrasco L. Fungal infection in neural tissue of patients with amyotrophic lateral sclerosis. *Neurobiol Dis.* 2017;108:249-260. doi:10.1016/j.nbd.2017.09.001
12. Andrade FC, Vergetti V, Cozza G, Falcao MC, Azevedo G. Amyotrophic Lateral Sclerosis-like Syndrome after Chikungunya. *Cureus.* October 2019. doi:10.7759/cureus.5876
13. Deutsch SI, Mohs RC, Davis KL. A rationale for studying the transmissibility of Alzheimer’s disease. *Neurobiol Aging.* 1982;3(2):145-147. doi:10.1016/0197-4580(82)90011-2
14. Taylor GR, Crow TJ, Markakis DA, Lofthouse R, Neeley S, Carter GI. Herpes simplex virus and Alzheimer’s disease: A search for virus DNA by spot hybridisation. *J Neurol Neurosurg Psychiatry.* 1984;47(10):1061-1065. doi:10.1136/jnnp.47.10.1061
15. Sochocka M, Zwolińska K, Leszek J. The Infectious Etiology of Alzheimer’s Disease. *Curr Neuropharmacol.* 2017;15(7). doi:10.2174/1570159x15666170313122937

- 891 16. Irkeç C. [Virologic and immunologic considerations in Parkinson's disease]. *Mikrobiyol*  
892 *Bul.* 1982;16(4):293-296. <http://www.ncbi.nlm.nih.gov/pubmed/6304477>. Accessed  
893 December 9, 2019.
- 894 17. Abushouk AI, El-Husseny MWA, Magdy M, et al. Evidence for association between  
895 hepatitis C virus and Parkinson's disease. *Neurol Sci.* 2017;38(11):1913-1920.  
896 doi:10.1007/s10072-017-3077-4
- 897 18. Parashar A, Udayabanu M. Gut microbiota: Implications in Parkinson's disease. *Park*  
898 *Relat Disord.* 2017;38:1-7. doi:10.1016/j.parkreldis.2017.02.002
- 899 19. Libbey JE, Cusick MF, Fujinami RS. Role of pathogens in multiple sclerosis. *Int Rev*  
900 *Immunol.* 2014;33(4):266-283. doi:10.3109/08830185.2013.823422
- 901 20. Alonso R, Pisa D, Carrasco L. Searching for Bacteria in Neural Tissue From Amyotrophic  
902 Lateral Sclerosis. *Front Neurosci.* 2019;13:171. doi:10.3389/fnins.2019.00171
- 903 21. Gil C, González AAS, León IL, et al. Detection of Mycoplasmas in Patients with  
904 Amyotrophic Lateral Sclerosis. *Adv Microbiol.* 2014;04(11):712-719.  
905 doi:10.4236/aim.2014.411077
- 906 22. Alonso R, Pisa D, Marina AI, et al. Evidence for fungal infection in cerebrospinal fluid and  
907 brain tissue from patients with amyotrophic lateral sclerosis. *Int J Biol Sci.*  
908 2015;11(5):546-558. doi:10.7150/ijbs.11084
- 909 23. Pisa D, Alonso R, Rábano A, Carrasco L. Corpora Amylacea of Brain Tissue from  
910 Neurodegenerative Diseases Are Stained with Specific Antifungal Antibodies. *Front*  
911 *Neurosci.* 2016;10:86. doi:10.3389/fnins.2016.00086
- 912 24. Cermelli C, Vinceti M, Beretti F, et al. Risk of sporadic amyotrophic lateral sclerosis  
913 associated with seropositivity for herpesviruses and echovirus-7. *Eur J Epidemiol.*  
914 2003;18(2):123-127. doi:10.1023/a:1023067728557
- 915 25. Berger MM, Kopp N, Vital C, Redl B, Aymard M, Lina B. Detection and cellular localization  
916 of enterovirus RNA sequences in spinal cord of patients with ALS. *Neurology.*  
917 2000;54(1):20-25. doi:10.1212/wnl.54.1.20
- 918 26. Vandenberghe N, Leveque N, Corcia P, et al. Cerebrospinal fluid detection of enterovirus  
919 genome in ALS: A study of 242 patients and 354 controls. *Amyotroph Lateral Scler.*  
920 2010;11(3):277-282. doi:10.3109/17482960903262083
- 921 27. Xue YC, Feuer R, Cashman N, Luo H. Enteroviral infection: The forgotten link to  
922 amyotrophic lateral sclerosis? *Front Mol Neurosci.* 2018;11.  
923 doi:10.3389/fnmol.2018.00063
- 924 28. Giraud P, Beaulieux F, Ono S, Shimizu N, Chazot G, Lina B. Detection of enteroviral  
925 sequences from frozen spinal cord samples of Japanese ALS patients. *Neurology.*  
926 2001;56(12):1777-1778. doi:10.1212/wnl.56.12.1777
- 927 29. Verma A, Berger JR. ALS syndrome in patients with HIV-1 infection. *J Neurol Sci.*  
928 2006;240(1-2):59-64. doi:10.1016/j.jns.2005.09.005
- 929 30. Moodley K, Bill PLA, Bhigjee AI, Patel VB. A comparative study of motor neuron disease in  
930 HIV-infected and HIV-uninfected patients. *J Neurol Sci.* 2019;397:96-102.  
931 doi:10.1016/J.JNS.2018.12.030
- 932 31. Douville R, Liu J, Rothstein J, Nath A. Identification of active loci of a human endogenous  
933 retrovirus in neurons of patients with amyotrophic lateral sclerosis. *Ann Neurol.*  
934 2011;69(1):141-151. doi:10.1002/ana.22149

- 935 32. Li W, Lee M-H, Henderson L, et al. Human endogenous retrovirus-K contributes to motor  
936 neuron disease. *Sci Transl Med*. 2015;7(307):307ra153-307ra153.  
937 doi:10.1126/scitranslmed.aac8201
- 938 33. Arru G, Mameli G, Deiana GA, et al. Humoral immunity response to human endogenous  
939 retroviruses K/W differentiates between amyotrophic lateral sclerosis and other  
940 neurological diseases. *Eur J Neurol*. 2018;25(8):1076-e84. doi:10.1111/ene.13648
- 941 34. Blacher E, Bashiardes S, Shapiro H, et al. Potential roles of gut microbiome and  
942 metabolites in modulating ALS in mice. *Nature*. 2019;572(7770):474-480.  
943 doi:10.1038/s41586-019-1443-5
- 944 35. Fang X, Wang X, Yang S, et al. Evaluation of the microbial diversity in amyotrophic lateral  
945 sclerosis using high-throughput sequencing. *Front Microbiol*. 2016;7(SEP).  
946 doi:10.3389/fmicb.2016.01479
- 947 36. Sun J, Zhan Y, Mariosa D, et al. Antibiotics use and risk of amyotrophic lateral sclerosis in  
948 Sweden. *Eur J Neurol*. 2019;26(11):1355-1361. doi:10.1111/ene.13986
- 949 37. Zhang Y guo, Wu S, Yi J, et al. Target Intestinal Microbiota to Alleviate Disease  
950 Progression in Amyotrophic Lateral Sclerosis. *Clin Ther*. 2017;39(2):322-336.  
951 doi:10.1016/j.clinthera.2016.12.014
- 952 38. Obrenovich M, Jaworski H, Tadimalla T, et al. The role of the microbiota–gut–brain axis  
953 and antibiotics in ALS and neurodegenerative diseases. *Microorganisms*. 2020;8(5).  
954 doi:10.3390/microorganisms8050784
- 955 39. Brenner D, Hiergeist A, Adis C, et al. The fecal microbiome of ALS patients. *Neurobiol*  
956 *Aging*. 2018;61:132-137. doi:10.1016/j.neurobiolaging.2017.09.023
- 957 40. Henkel JS, Beers DR, Wen S, Bowser R, Appel SH. Decreased mRNA expression of tight  
958 junction proteins in lumbar spinal cords of patients with ALS. *Neurology*.  
959 2009;72(18):1614-1616. doi:10.1212/WNL.0b013e3181a41228
- 960 41. Garbuzova-Davis S, Sanberg PR. Blood-CNS barrier impairment in ALS patients versus an  
961 animal model. *Front Cell Neurosci*. 2014;8(FEB):21. doi:10.3389/fncel.2014.00021
- 962 42. Zhang R, Miller RG, Gascon R, et al. Circulating endotoxin and systemic immune  
963 activation in sporadic amyotrophic lateral sclerosis (sALS). *J Neuroimmunol*. 2009;206(1-  
964 2):121-124. doi:10.1016/j.jneuroim.2008.09.017
- 965 43. Mantovani S, Garbelli S, Pasini A, et al. Immune system alterations in sporadic  
966 amyotrophic lateral sclerosis patients suggest an ongoing neuroinflammatory process. *J*  
967 *Neuroimmunol*. 2009;210(1-2):73-79. doi:10.1016/j.jneuroim.2009.02.012
- 968 44. Murdock BJ, Zhou T, Kashlan SR, Little RJ, Goutman SA, Feldman EL. Correlation of  
969 peripheral immunity with rapid Amyotrophic lateral sclerosis progression. *JAMA Neurol*.  
970 2017;74(12):1446-1454. doi:10.1001/jamaneurol.2017.2255
- 971 45. Sta M, Sylva-Steenland RMR, Casula M, et al. Innate and adaptive immunity in  
972 amyotrophic lateral sclerosis: Evidence of complement activation. *Neurobiol Dis*.  
973 2011;42(3):211-220. doi:10.1016/j.nbd.2011.01.002
- 974 46. Correia AS, Patel P, Dutta K, Julien JP. Inflammation induces TDP-43 mislocalization and  
975 aggregation. *PLoS One*. 2015;10(10). doi:10.1371/journal.pone.0140248
- 976 47. Verber NS, Shephard SR, Sassani M, et al. Biomarkers in motor neuron disease: A state  
977 of the art review. *Front Neurol*. 2019;10(APR):291. doi:10.3389/fneur.2019.00291
- 978 48. Blasco H, Corcia P, Moreau C, et al. 1H-NMR-Based metabolomic profiling of CSF in early

- 979 amyotrophic lateral sclerosis. *PLoS One*. 2010;5(10). doi:10.1371/journal.pone.0013223
- 980 49. Blasco H, Veyrat-Durebex C, Bocca C, et al. Lipidomics Reveals Cerebrospinal-Fluid
- 981 Signatures of ALS. *Sci Rep*. 2017;7(1). doi:10.1038/s41598-017-17389-9
- 982 50. Mitchell RM, Freeman WM, Randazzo WT, et al. A CSF biomarker panel for identification
- 983 of patients with amyotrophic lateral sclerosis. *Neurology*. 2009;72(1):14-19.
- 984 doi:10.1212/01.wnl.0000333251.36681.a5
- 985 51. Guo J, Yang X, Gao L, Zang D. Evaluating the levels of CSF and serum factors in ALS. *Brain*
- 986 *Behav*. 2017;7(3). doi:10.1002/brb3.637
- 987 52. Young PE, Jew SK, Buckland ME, Pamphlett R, Suter CM. Epigenetic differences between
- 988 monozygotic twins discordant for amyotrophic lateral sclerosis (ALS) provide clues to
- 989 disease pathogenesis. *PLoS One*. 2017;12(8). doi:10.1371/journal.pone.0182638
- 990 53. Coppèdè F, Stoccoro A, Mosca L, et al. Increase in DNA methylation in patients with
- 991 amyotrophic lateral sclerosis carriers of not fully penetrant SOD1 mutations. *Amyotroph*
- 992 *Lateral Scler Front Degener*. 2018;19(1-2):93-101. doi:10.1080/21678421.2017.1367401
- 993 54. Swindell WR, Kruse CPS, List EO, Berryman DE, Kopchick JJ. ALS blood expression profiling
- 994 identifies new biomarkers, patient subgroups, and evidence for neutrophilia and hypoxia.
- 995 *J Transl Med*. 2019;17(1):170. doi:10.1186/s12967-019-1909-0
- 996 55. Waller R, Wyles M, Heath PR, et al. Small RNA sequencing of sporadic amyotrophic
- 997 lateral sclerosis cerebrospinal fluid reveals differentially expressed miRNAs related to
- 998 neural and glial activity. *Front Neurosci*. 2018;11(JAN). doi:10.3389/fnins.2017.00731
- 999 56. Waller R, Goodall EF, Milo M, et al. Serum miRNAs miR-206, 143-3p and 374b-5p as
- 1000 potential biomarkers for amyotrophic lateral sclerosis (ALS). *Neurobiol Aging*.
- 1001 2017;55:123-131. doi:10.1016/j.neurobiolaging.2017.03.027
- 1002 57. Gendron TF, Chew J, Stankowski JN, et al. Poly(GP) proteins are a useful
- 1003 pharmacodynamic marker for C9ORF72-associated amyotrophic lateral sclerosis. *Sci*
- 1004 *Transl Med*. 2017;9(383):7866. doi:10.1126/scitranslmed.aai7866
- 1005 58. Gagliardi S, Zucca S, Pandini C, et al. Long non-coding and coding RNAs characterization
- 1006 in Peripheral Blood Mononuclear Cells and Spinal Cord from Amyotrophic Lateral
- 1007 Sclerosis patients. *Sci Rep*. 2018;8(1):2378. doi:10.1038/s41598-018-20679-5
- 1008 59. Zucca S, Gagliardi S, Pandini C, et al. RNA-Seq profiling in peripheral blood mononuclear
- 1009 cells of amyotrophic lateral sclerosis patients and controls. *Sci Data*. 2019;6(1):190006.
- 1010 doi:10.1038/sdata.2019.6
- 1011 60. Rahman MR, Islam T, Huq F, Quinn JMW, Moni MA. Identification of molecular signatures
- 1012 and pathways common to blood cells and brain tissue of amyotrophic lateral sclerosis
- 1013 patients. *Informatics Med Unlocked*. 2019;16:100193. doi:10.1016/J.IMU.2019.100193
- 1014 61. van Rheenen W, Diekstra FP, Harschnitz O, et al. Whole blood transcriptome analysis in
- 1015 amyotrophic lateral sclerosis: A biomarker study. *PLoS One*. 2018;13(6):e0198874.
- 1016 doi:10.1371/journal.pone.0198874
- 1017 62. Parker J, Chen J. Application of next generation sequencing for the detection of human
- 1018 viral pathogens in clinical specimens. *J Clin Virol*. 2017;86:20-26.
- 1019 doi:10.1016/j.jcv.2016.11.010
- 1020 63. Bouquet J, Gardy JL, Brown S, et al. RNA-Seq Analysis of Gene Expression, Viral Pathogen,
- 1021 and B-Cell/T-Cell Receptor Signatures in Complex Chronic Disease. *Clin Infect Dis*.
- 1022 2017;64(4):476-481. doi:10.1093/cid/ciw767



- 1023 64. Westermann AJ, Barquist L, Vogel J. Resolving host-pathogen interactions by dual RNA-  
1024 seq. *PLoS Pathog.* 2017;13(2):e1006033. doi:10.1371/journal.ppat.1006033
- 1025 65. Moore RA, Warren RL, Freeman JD, et al. The Sensitivity of Massively Parallel Sequencing  
1026 for Detecting Candidate Infectious Agents Associated with Human Tissue. Jordan IK, ed.  
1027 *PLoS One.* 2011;6(5):e19838. doi:10.1371/journal.pone.0019838
- 1028 66. Poussin C, Sierro N, Boué S, et al. Interrogating the microbiome: experimental and  
1029 computational considerations in support of study reproducibility. *Drug Discov Today.*  
1030 2018;23(9):1644-1657. doi:10.1016/j.drudis.2018.06.005
- 1031 67. Roumpeka DD, Wallace RJ, Escalettes F, Fotheringham I, Watson M. A review of  
1032 bioinformatics tools for bio-prospecting from metagenomic sequence data. *Front Genet.*  
1033 2017;8(MAR). doi:10.3389/fgene.2017.00023
- 1034 68. Mangul S, Yang HT, Strauli N, et al. ROP: dumpster diving in RNA-sequencing to find the  
1035 source of 1 trillion reads across diverse adult human tissues. *Genome Biol.* 2018;19(1):36.  
1036 doi:10.1186/s13059-018-1403-7
- 1037 69. Cavadas B, Ferreira J, Camacho R, Fonseca NA, Pereira L. QmihR: Pipeline for  
1038 Quantification of Microbiome in Human RNA-seq. In: Springer, Cham; 2017:173-179.  
1039 doi:10.1007/978-3-319-60816-7\_21
- 1040 70. Simon LM, Karg S, Westermann AJ, et al. MetaMap: an atlas of metatranscriptomic reads  
1041 in human disease-related RNA-seq data. *Gigascience.* 2018;7(6).  
1042 doi:10.1093/gigascience/giy070
- 1043 71. Gihawi A, Rallapalli G, Hurst R, Cooper CS, Leggett RM, Brewer DS. SEPATH:  
1044 benchmarking the search for pathogens in human tissue whole genome sequence data  
1045 leads to template pipelines. *Genome Biol.* 2019;20(1):208. doi:10.1186/s13059-019-  
1046 1819-8
- 1047 72. Cox JW, Ballweg RA, Taft DH, Velayutham P, Haslam DB, Porollo A. A fast and robust  
1048 protocol for metataxonomic analysis using RNAseq data. *Microbiome.* 2017;5(1):7.  
1049 doi:10.1186/s40168-016-0219-5
- 1050 73. Almeida A, Mitchell AL, Boland M, et al. A new genomic blueprint of the human gut  
1051 microbiota. *Nature.* 2019;568(7753):499-504. doi:10.1038/s41586-019-0965-1
- 1052 74. Papudeshi B, Haggerty JM, Doane M, et al. Optimizing and evaluating the reconstruction  
1053 of Metagenome-assembled microbial genomes. *BMC Genomics.* 2017;18(1):915.  
1054 doi:10.1186/s12864-017-4294-1
- 1055 75. Humphrys MS, Creasy T, Sun Y, et al. Simultaneous transcriptional profiling of bacteria  
1056 and their host cells. Ramsey K, ed. *PLoS One.* 2013;8(12):e80597.  
1057 doi:10.1371/journal.pone.0080597
- 1058 76. Emanuel W, Kirstin M, Vedran F, et al. Bulk and single-cell gene expression profiling of  
1059 SARS-CoV-2 infected human cell lines identifies molecular targets for therapeutic  
1060 intervention. *bioRxiv.* May 2020:2020.05.05.079194. doi:10.1101/2020.05.05.079194
- 1061 77. Boni MF, Lemey P, Jiang X, et al. Evolutionary origins of the SARS-CoV-2 sarbecovirus  
1062 lineage responsible for the COVID-19 pandemic. *Nat Microbiol.* July 2020:1-10.  
1063 doi:10.1038/s41564-020-0771-4
- 1064 78. Zhao S, Zhang Y, Gamini R, Zhang B, von Schack D. Evaluation of two main RNA-seq  
1065 approaches for gene quantification in clinical RNA sequencing: polyA+ selection versus  
1066 rRNA depletion. *Sci Rep.* 2018;8(1):4781. doi:10.1038/s41598-018-23226-4

- 1067 79. Shin H, Shannon CP, Fishbane N, et al. Variation in RNA-Seq Transcriptome Profiles of  
1068 Peripheral Whole Blood from Healthy Individuals with and without Globin Depletion.  
1069 Wang K, ed. *PLoS One*. 2014;9(3):e91041. doi:10.1371/journal.pone.0091041  
1070 80. Castillo DJ, Rifkin RF, Cowan DA, Potgieter M. The healthy human blood microbiome: Fact  
1071 or fiction? *Front Cell Infect Microbiol*. 2019;9(MAY):148. doi:10.3389/fcimb.2019.00148  
1072 81. Mackay IM, Arden KE, Nitsche A. Real-time PCR in virology. *Nucleic Acids Res*.  
1073 2002;30(6):1292-1305. doi:10.1093/nar/30.6.1292  
1074 82. Linsley PS, Speake C, Whalen E, Chaussabel D. Copy number loss of the interferon gene  
1075 cluster in melanomas is linked to reduced T cell infiltrate and poor patient prognosis.  
1076 *PLoS One*. 2014;9(10). doi:10.1371/journal.pone.0109760  
1077 83. Brohawn DG, O'Brien LC, Bennett JP. RNAseq analyses identify tumor necrosis factor-  
1078 mediated inflammation as a major abnormality in ALS spinal cord. *PLoS One*.  
1079 2016;11(8):e0160520. doi:10.1371/journal.pone.0160520  
1080 84. C Ladd A, G Brohawn D, P Bennett J. Laser-captured spinal cord motorneurons from ALS  
1081 subjects show increased gene expression in vacuolar ATPase networks. *J Syst Integr*  
1082 *Neurosci*. 2017;3(6). doi:10.15761/jsin.1000182  
1083 85. Bennett JP, Keeney PM, Brohawn DG. RNA Sequencing Reveals Small and Variable  
1084 Contributions of Infectious Agents to Transcriptomes of Postmortem Nervous Tissues  
1085 From Amyotrophic Lateral Sclerosis, Alzheimer's Disease and Parkinson's Disease  
1086 Subjects, and Increased Expression of Genes From Disease-Activated Microglia. *Front*  
1087 *Neurosci*. 2019;13. doi:10.3389/fnins.2019.00235  
1088 86. Kowarsky M, Camunas-Soler J, Kertesz M, et al. Numerous uncharacterized and highly  
1089 divergent microbes which colonize humans are revealed by circulating cell-free DNA.  
1090 *Proc Natl Acad Sci U S A*. 2017;114(36):9623-9628. doi:10.1073/pnas.1707009114  
1091
